# Supplementary material for: Full-length transcriptomic identification of R2R3-MYB family genes related to secondary cell wall development in Cunninghamia lanceolata (Chinese fir)
Source: BMC Plant Biol. 2021 Dec 8;21:581. doi: 10.1186/s12870-021-03322-w (PMC8653563; doi:10.1186/s12870-021-03322-w)
Supplement: Supplementary file 4 — Additional file 4: Table S1. Primers used in the analysis of qRT-PCR, subcellular localization, yeast hybridization, overexpression, and semi-qRT-PCR. [file 12870_2021_3322_MOESM4_ESM.docx]

**Full-length transcriptomic identification of R2R3-MYB family genes related to secondary cell wall development in *Cunninghamia lanceolata* (Chinese fir)**

Hebi Zhuang1§, Sun-Li Chong1§, Borah Priyanka1, Xiao Han1, Erpei Lin1, Zaikang Tong1, Huahong Huang1*

1State Key Laboratory of Subtropical Silviculture, Zhejiang A&F University, Lin'an, Hangzhou 311300, China

§These authors contributed equally to this work.

Table S1. Primers used in the analysis of qRT-PCR, subcellular localization, yeast hybridization, overexpression, and semi-qRT-PCR.

| Function | Gene | Forward primer (5’ - 3’) | Reverse primer (5’ - 3’) |
| --- | --- | --- | --- |
| qRT-PCR | *ClActin* | GTACTGCTTGTAGGTGGAGTTGC | TAGAATACCAAGAACAGCACCAC |
| *ClMYB1* | GCGATTGGCTTCATTGCTTGAG | TACAGAGGAACACACGAGCGATG |
| *ClMYB2* | GAATGAGCAACATAAGGGAGGAG | TCTTAGGTTCCAATGTAGCCAGC |
| *ClMYB3* | CAGAACTCCGAAGTAACCAGCTC | GGTGGAACAAGGCAAACTGATAC |
| *ClMYB4* | AGGTCTGGCTTATGATTACAGGC | CAGAGGCAACAAATGCTTATCTAC |
| *ClMYB5* | GGAGTATGGATTTCCAAACCCAG | CGATCAACCCAAGAGCTTTCATC |
| *ClMYB11* | GCTCTGTGTTGTCTGCCATTGTAG | CCCTTTATTCTCTCACGCTCTCTC |
| *ClMYB12* | AGCAAGCAGGACTTTTGAGATGTG | CATTATCTGTTCTTCCAGGCAGGC |
| *ClMYB16* | GACTGTAAACGGGCATTTCATAG | GCATCTCTATTCACAGACACAGC |
| *ClMYB24* | GGACACATTCTCAAGCTGAAG | GTACGAGGATAGCTGTTCAGTG |
| *ClMYB25* | TGGATCTCAGACTGTATTGTCAG | GTTGAAAGCTGAATGTCATGCAC |
| *ClMYB26* | GGAATAGCAGCAGCAACATAGAG | ATGTCCAGAAGGCTTGGTTTCAG |
| *ClMYB42* | CGCTGTGGAATATTGACATGGAG | TAGTCGTGGTGCATTTGTGATAC |
| *ClMYB49* | GCTGATTGTAAGGGTGATGACAG | CTCCTCCTAATGAATTACCTGTG |
| *ClMYB51* | CAGCCATCAAGTGACTGTGCCTC | CCGAAGGCTGGCTAGACGAAGAG |
| Subcellular localization | *ClMYB1* | CGGGGTACCACTATGGGAAGGCAGCCGTGCT | GCTCTAGACATTTCCTCAAGCAATGAAGCCA |
| Yeast hybridization | *ClMYB1* | ATGGGAAGGCAGCCGTGCTGTG | CATTTCCTCAAGCAATGAAGC |
| Overexpression | *ClMYB1* | CGGGGTACCCTCGCATACTATGGGAAGGCAGC | GCTCTAGATACAGAGGAACACACGAGCGATG |
| Semi-qRT-PCR | *ClMYB1* | TGCTGCTTCTGTGGATAACAATG | TACAGAGGAACACACGAGCGATG |
| *NbActin* | CTAGAGACTTCAAAGACCAGCTC | ATAGAGCCTCCTATCCAGACACT |
