# Supplementary material for: Full-length transcriptomic identification of R2R3-MYB family genes related to secondary cell wall development in Cunninghamia lanceolata (Chinese fir)
Source: BMC Plant Biol. 2021 Dec 8;21:581. doi: 10.1186/s12870-021-03322-w (PMC8653563; doi:10.1186/s12870-021-03322-w)
Supplement: Supplementary file 5 — Additional file 5: Table S2. Physicochemical properties and protein-coding sequences of ClMYB transcription factors. [file 12870_2021_3322_MOESM5_ESM.xlsx]

## Sheet: Sheet1
Full-length transcriptomic identification of R2R3-MYB family genes related to secondary cell wall development in Cunninghamia lanceolata (Chinese fir)
Hebi Zhuang1§, Sun-Li Chong1§, Borah Priyanka1, Xiao Han1, Erpei Lin1, Zaikang Tong1, Huahong Huang1*
1State Key Laboratory of Subtropical Silviculture, Zhejiang A&F University, Lin'an, Hangzhou 311300, China
§These authors contributed equally to this work.
Table S2: Physicochemical properties and protein-coding sequences of ClMYB transcription factors.
Gene name	ORF length (bp)	Amino acid count	Protein M.W.	pI	Instability index	Aliphatic index	Grand average of hydropathicity	gene sequence
			(Da)
ClMYB1	912	303	33850.9	5.23	54.17	62.31	-0.857	ATGGGAAGGCAGCCGTGCTGTGACAAGGTAGGGTTGAAGAAGGGCCCATGGACTACCGATGAGGACAGAAAACTCGTGAA TTTTATTTCCGTGCACGGCCATGGATGCTGGCGCGAAGTGCCCAAACTTGCAGGCCTGCTTCGATGCGGAAAGAGCTGTA GATTGCGCTGGACAAACTACTTGCGACCGGATTTGAAACGCGGATTGCTGTCTGAATCCGAAGAGAAACTCATCATCGAC TTACATGCTGCCATTGGAAACAGGTGGTCGAGAATCGCTGCACAGTTGCCAGGAAGGACGGACAATGAGATAAAAAACTA CTGGAACACGCGCATCAAGAAAAAGTTGAGGCAAATGGGAATCGATCCTGCGACGCACAAGCCCCTGAACCAAAT…
ClMYB2	1011	336	38656.6	9.08	52.46	64.46	-0.839	ATGAAGGAATATAGCTCTTGTTCCAAAGAAACTGAGGCTAATTTTTGTAACCCAAAATTACCTGAAACACCATGTGGGAG GGGACACTGGAGGCCAGATGAGGATGAGAAACTCAAGGAGCTTGTTGCACAGTTTGGGCCACAGAATTGGAATGCCATAG CAGAGAAACTTGAAGGCAGATCAGGAAAGAGTTGCAGGCTAAGATGGTTTAATCAACTTGATCCAAAGATAAACAGGCGT CCATTTTCAGAAGAGGAAGAACAGCGCCTGCTAGCTTGTCACCGTTTACATGGCAATAGATGGGCTATCATTGCCAGGTT ATTTGAAGGAAGAACTGATAATGCAGTCAAAAATCACTGGCATGTCATCATGGCCAGAAGACACAGGGAACACTC…
ClMYB3	648	215	24326.5	8.59	44.77	78.09	-0.713	ATGGGAAGATCTCCCTGCTGTGAAAAGGCACATACAAATAAAGGGGCATGGACTAAAGAAGAAGATGACAGGCTTACTGC CCACATTCAAGCCCATGGAGAAGGCAACTGGAGGTCCCTCCCAAAGGCTGCAGGGCTGCTCAGATGTGGGAAGAGCTGCA GATTAAGGTGGATAAACTATTTGAGACCTGATCTCAAGCGAGGAGATTTCTCTGATGATGAGGACGACCTTATCATCAAG CTTCATGCCCTCTTGGGAAACAGATGGTCTCTAATTGCAGGTAGATTGCCCGGACGAACAGACAATGAAATAAAGAATTA CTGGAACACCCACGTCAAGAGGAAATTGCTGAGCCGTGGAGTCGACCTACTCTCTCACCGTCCTAATTTCAGCCT…
ClMYB4	780	259	29327	8.6	51.98	71.27	-0.757	ATGGGAAGATCTCCCTGCTGTGAAAAGGCACATACAAATAAAGGGGCATGGACTAAAGAAGAAGATGACAGGCTTATTGC CCACATCCAAGCCCATGGTGAAGGCTGCTGGAGATCCCTCCCAAAGGCAGCAGGGCTGCTGAGATGTGGGAAGAGTTGCA GGCTAAGGTGGATTAATTATTTGCGCCCTGATCTCAAGCGGGGAAACTTTTCTGATGAAGAAGATGAACTCATCATAAAA CTCCATGCCCTCCTCGGAAACAAATGGTCTCTGATAGCAGGTAGATTGCCAGGGAGAACAGACAATGAAATAAAGAACTA CTGGAATACCCACATCAAGAGAAAATTGTTCAGCCGGGGAATCGATCCAAACTCTCACCGCCCAATTCATTCCTT…
ClMYB5	735	244	27511.7	6.66	60.11	72.42	-0.755	ATGGGAAGATCTCCCTGCTGTGAAAAAACACATACAAATAAAGGAGCATGGACCAAAGAAGAAGATGACAAGCTCATTGC CCACATTCAAACCCATGGTGAAGGCTGCTGGAGATCTCTTCCCAAGGCTGCAGGGCTTCTGAGATGTGGGAAGAGCTGCA GGCTAAGGTGGATAAACTATCTGAGACCTGATCTCAAGCGGGGGAATTTCTCTGAAGAAGAAGATGAACTCATCATCAAG CTGCAACTTCTCTTGGGAAACAAATGGTCTCTGATTGCAGGGAGATTGCCTGGGCGAACAGACAATGAAATAAAGAATTA CTGGAACACCCACATCAAAAGAAAATTGCTGAGCCGAGGAATCGACCCACAGTCGCGCCGCCCTATTCAGCCCTT…
ClMYB6	774	257	28045.4	7.5	47.25	66.89	-0.493	ATGGGGAGATCTCCTTGCTGTGAAAAAGCTCACACCAACAAAGGGGCATGGAGTAAACAAGAGGATGAAACTCTCATTGC ATATATTCAGGCCCATGGTGAAGGCTGTTGGAGAACTCTTCCAAAGGCAGCAGGATTGCAGCGCTGTGGGAAGAGTTGCA GGCTTCGATGGATAAATTATCTTCGCCCTGATCTTAAACGGGGAAATTTTACCCCAGAAGAAGATGAGCTTATTATAAAG CTCCATTCCATTCTGGGTAACAAGTGGTCCTTAATTGCTGGGAAACTACCAGGAAGAACTGATAATGAGATAAAGAACTA CTGGAACACACATATAAAGAAGAAGCTGTTAGAGAAGGGAATGGATCCTTATACCCATTGCCCCATTGTCACATC…
ClMYB7	1341	446	50385.1	5.77	48.43	63.21	-0.781	ATGGGGCGAGCTTCATGCTGTGATGAAATGGGATTGAAGAAGGGACCTTGGACTCCTGAAGAAGATCAAATTCTCATCGC TTACATTAACAAGAACGGCCATGGAAATTGGCGAGCTCTGCCCAAACAAGCAGGGCTTATGCGATGTGGGAAAAGCTGTC GACTGCGATGGACAAATTATCTGAGACCAGACATCAAGCGTGGCAACTTTAGTCTAAAGGAGGAGCAGACAATCATCCAA CTCCATCAAATTCTGGGAAATAGATGGTCAGCGATCGCCTCACACCTCCCCGGAAGAACAGACAACGAGATAAAAAATGT ATGGAACACACATCTGAAAAAACGTCTGCTCCAAATAGGAGTAGACCCAGTAACTCATGCTCCTCGAGGCTACAC…
ClMYB8	951	316	34393	9.38	60.91	74.53	-0.491	ATGGCGTTGCTGAAGAATAGTGAAGAGGTTGACAGAATTAAAGGGCCGTGGAGCCCTGAAGAAGACGCGGCATTGCAGCG ATATGTGCAGAAATATGGGCCGAGAAATTGGTCGCTTATAAGTAAAGCCATTCCGGGGAGATCAGGGAAATCCTGCAGAC TGCGGTGGTGTAATCAGCTGAGTCCTCAGGTTGAGCATAGGCCGTTTACGGCCGAAGAGGATGCCGCCATTGTTAGAGCT CATGCTCAGCACGGCAACAAATGGGCAACCATTGCGAGGATGTTGTCTGGGCGAACTGACAATGCGATTAAAAATCACTG GAATTCCACGCTGCGGAGACGCTGCTTGAGCAACGCGGAGGGCGCTTTAATGGAGGAAGAAGGCGATCGAAAGCG…
ClMYB9	1197	398	42522	8.8	59.22	70.38	-0.476	ATGGCCGAGAAAGCAGCGGGCGTGGATCGGATTAAAGGGCCGTGGAGCCCTGAGGAAGATGCGCTTTTGCAACGCCTGGT TCAGAAATATGGAGCCAGAAATTGGTCGCTTATTAGCAAAGGTATTCTTGGACGCTCTGGCAAATCATGCCGTCTGCGCT GGTGCAATCAACTGAGCCCTCAGGTTGAGCACCGTCCCTTTACGCCTGATGAAGACGCTGCCATTGTGCAGGCGCATGCT AAGCACGGCAATAAATGGGCGACGATCGCGAGATATTTGCCAGGGCGTACCGACAACGCCATTAAAAACCACTGGAACTC GACCCTGCGTCGGCGCTGCGGGGATTCGAACCCTGGACCTGCTGCCGCCGCGCCTAATGATGACAACAGCAGCAG…
ClMYB10	1212	403	45289.6	6.46	60.14	72.21	-0.66	ATGGGAAGGCGCCATGTGTGTTGTCACAAGCAGAAGCTGAAGAAAGGCCTCTGGTCTCCAGAAGAAGATGAGAAGTTAAT GCAATACATTACAAAATATGGTCATGGTCGCTGGAGTTCTGTGCCCAAGCATGCAGGTTTAGAACGTTGTGGGAAGAGTT GCAGGCTACGTTGGATAAACTACCTGAGGCCAGATCTGAAAAGAGGCACGTTTTCTAGCTACGAGGAGAACCTTATCATT AATCTTCATGCAGCCCTTGGGAACAGATGGTCGCAGATAGCTACACAACTGCCAGGGAGAACTGACAACGAGATAAAGAA CTTCTGGAACTCATGCATCAAGAAGAAGCTCAGGGCCAAGGGCATAGATCCCAGCACCCACAAGATCATTAGCGA…
ClMYB11	1242	413	45546	8.35	55.05	64.58	-0.74	ATGGCTATGGGGAACGCATCAGAGAAGAACAGTTGTGGGGAAAGGGAGAGAGAGCGTGAGAGAATAAAGGGGCCATGGAG CCCAGAAGAAGATGCAGCCCTACACAAACTGGTAGAAAAACTGGGGCCGCGCAACTGGTCCCTCATCAGTAAGGGCATCC CGGGGAGGTCAGGAAAATCATGCCGCCTGCGGTGGTGTAATCAGCTGAGCCCGCAGGTTCAGCACCGCCCTTTTTCCCCT GAAGAAGATCGGCTCATCATCCAAGCCCATGCTCAGCACGGCAACAAATGGGCAACCATTGCCCGAATCCTGCCTGGCCG CACTGATAACGCCATTAAAAACCACTGGAATTCTACCCTCCGCCGCCGATACCTTGCTGAGAAATCCCCTTCCCA…
ClMYB12	1083	360	40916.8	4.7	51.49	77.19	-0.508	ATGGGGCCTTCAAATTCAGCAATTTTGGTTTCCCATATTTTTGTTTACAGTGGTCTTCAAATCCAGCACTTTTTGTTGGA AGTCCTACTTCCAACACTTTTGTTCACCATTTTTGTGCGAGAAACAATGGGCCGAGCTCCCTGTTGTGATAAAATGGGAG TAAAGAAAGGTCCATGGACTGCTCAAGAGGATCAAATACTTGTTGATTTTATTCAGAGAAATGGTCTTGGGAATTGGCGT GCTCTCCCCAAGCAAGCAGGACTTTTGAGATGTGGAAAAAGCTGTCGTTTAAGGTGGATTAATTATCTCAGACCAGACAT CAAACGTGGGAATTTTAGTGATGAAGAGGAGGAGGCTATTATTAAGCTTCACCAACTTTTGGGCAACAGATGGTC…
ClMYB13	1125	374	42052.8	4.71	66.56	77.46	-0.536	ATGGGCAGAGCTCCTTGCTGTGATAAAATGGGGCTAAAGAAAGGTCCTTGGACTCCTCAAGAAGATCAAATACTCATTGA TTTCATTCGCAGAAATGGCCATGGGAATTGGCGTGCGCTTCCTAAACAAGCAGGACTTTTAAGATGCGGTAAGAGTTGTC GTCTACGGTGGATTAATTACCTCAGACCAGACATTAAAAGAGGGGATTTTAGCCCTGAAGAGGAGGAAGCCATTATTAAG CTTCACCAACGTCTGGGCAACAGGTGGTCGGCCATTGCTTCACGCCTGCCTGGAAGAACAGATAATGAGATAAAGAATGT GTGGAATACCCACCTGAAGAAGCGGCTTCTGCGAATGGGAATCGATCCGGTGACCCATGCAGTAACAAAGAATTC…
ClMYB14	1083	360	39633.2	5.89	53.22	72.33	-0.521	ATGGGACGGACGCCTTGCTGTGAGAAAGTGGGTCTTAACAGAGGTCCATGGACGCCTGAGGAAGATCTTCGCTTATCAAA TTATGTTGAAACTCATGGCGAGGGAGGCTGGAGAACCCTCCCTAAAAAAGCAGGCCTGCTTCGGTGTGAGAAGAGCTGCA GATTGCGGTGGATGAATTATCTTCGACCTGATGTTAAAAGAGGGAAGATTCTGCCCGAAGAAGAAGATTTAATACTTCGG TTGCACCGCCTTCTGGGAAATAGGTGGTCTTTAATAGCAGGTCGAATGCCTGGTAGAACTGATAATGAGATAAAGAACTA TTGGAACACCCATCTCAGCAAAAAGCTTATCACCCAGGGCATAGATCCCAGGACTCACAAGCCACTCTCTGTAAT…
ClMYB15	729	242	27845.2	8.48	68.01	68.93	-0.717	ATGTATGAGCAGGAAAAAGAGAAGACAAGAAAAGGTCCATGGACTGCAGAGGAGGATATGCAGCTTGTTAGGTATATATC TCTTCATGCTGAAGGCCGTTGGAATTTCCTAGCCAAAGCTGCAGGCCTGAAGAGAAGTGGGAAGAGCTGCAGGCTGAGGT GGGTTAACTATCTACGCCCAGATCTCAAGAGAGGCAACATTACTCCAGAAGAAGAGTGTTTGATCATAGACCTACAAAGC CGTTGGGGTAACAGGTGGTCTCGAATTGCCCAGCGGTTGCCTGGCCGGACAGACAATGAAATTAAGAACTACTGGAGGAC AAGGATTAAAAGAAGATTTCATAGAGCAAGCACTGGAAATGGATCACCATATCATTCAATTTATTCCACCTATGT…
ClMYB16	1260	419	47898.3	6.25	61.92	60.72	-0.799	ATGAGCCTGAAAGAATTAGATGAGACCATGTGCCCTTTACCTCAGTGGTTGCAAAGGAGCACAGGTTTTGAACCTGTGAC GTTTGAGTTGTTGAGCAAGGATGTGGGAGGCTTTCTTGAAGGAGGAAGATGTGTTTCTGGTGAGAGTCAGTGTAGAAGCG AGATAGCCTTCCAGCAGGTGCTTAGTCCTACTACAGAACAACAACAATGGCTGCAGCAGCGGCAGGGCAGCTCTAGGGTG GAGAATGAGGAGGAGTATTGCACCAACAGAAAGGAGAGTGAGGAGATGGATGATTCCAATGGTAAAGGAGTTCAGGAGTC TTGTGGGCAGTCCAAGTTATGCGCCAGAGGGCATTGGAGGCCTGCTGAGGATGCCAAGCTTAAGGAGCTTGTGGC…
ClMYB17	888	295	33534	8.57	49.93	78.07	-0.616	ATGACTCGAGCTCCCCCAGTTGAACTACTCAACCGAGGCCCATGGACAGCTGAGGAAGATATGCTGCTGAAAAAGTATAT TGAAGCTAATGGTGTGGGACGTTGGAGTACTCTTCCCCTCAAAGCTGGTTTGATGAGGTGTGGAAAGAGTTGCAGATTGC GTTGGATGAATCATCTGCGCCCAAATGTTAAGCGCGGCCAGATTTCTCCAGATGAAGAGGATCTCATCATAAGGCTTCAT AATCTATTGGGTAACCGATGGTCGTTGATTGCAGGGCGAGTACCTGGCAGAACAGACAATGAGGTAAAAAACTACTGGAA TACTCATTTGAGCAGAAAGTTAGACAACAAATCGTTTGCACGGAGGAAGACCGTGACAAAGATTGCTGAGGGGCA…
ClMYB18	909	302	34674.3	8.86	58.41	70.36	-0.823	ATGAGAGGAAAGAGAATGTTGGATGGGCTTAACCGAGGACAATGGCAACCTCAGGAAGATCTGCTTTTGAAAAAATACAT TGAAGAAAATGGAGTGGGGCGTTGGAGTTCTCTTCCCACCAAAGCGGGTTTGAAGAGGTGTGGAAAGAGTTGTAGGTTGC GGTGGATGAATTACCTTCGTCCAGATGTAAAGCGAGGCCACATTTCTGAGGACGAAGAAGATCTTATTATGAGGCTTCAC AAACTGCTTGGAAATAGGTGGTCGCTGATTGCCGCTCGTGTACCGGGAAGAACAGACAACGACGTAAAGAACTTCTGGAA TATTCATCGGAGTAAGAAACCTGGCTGCAAGGACGCAAAACTCAACAGCTCCATGTCAAAGGAAAAATATACCAC…
ClMYB19	1374	457	52173.3	6.54	59.36	62.28	-0.741	ATGAACCCCAAGGAATTAGAAGAGACCATGTGCCTTTCACCTCAGTGGCAGCAAACCAGCAGCAGCAGGACTGGTGTGGA ACCTTTGATGTTTGAGTTGTTGAGGAAAGAGGAGGGTTTGAGTGGAGAAGGAAGATGTGTGTCTGGTGAAAGCCAATGTA GAAGTGAGATAGCCTTCCAACAGGTGCTCAGCCTTAGTTGGCAACAACAAAATATGCTGCTGCAGCAGCAGCAGCAACAG TGCAAGACATGGGGTATGGAGATGGAGAGCAGTTCCAGTAGAGGGAGTAGCAGGTCAGAGAACTGTTGCAGCCACCAGGA TTTCTCCATCAAGGAGATAGAAAGTGAGGAGATTGAGAATTCCAGTGAGAAAGAAGTGGTGGACTCGTGTGTACA…
ClMYB20	912	303	34214.5	6.75	59.05	71.78	-0.552	ATGGGACGGACTCCTTGCTGTAGAAAAGTGGATCTTAACAGAGGTCCATGGACGCCAGAAGAAGATCTCCGTTTAACAAA TTATGTCCAGGCTCATGGCGAAGGCCGCTGGAGATCTCTTTCCAAGAAAGCAGGTCTGCTTCGATCTGGAAAGAGCTGTA GAATGCGATGGTTAAATTATCTTCGACCTGATGTCAAACGAGGATATATCTTACCTGACGAAGAAGATTTAATTCTCAGG GTCCATCGACTTCTGGGAAACAGATGGTCTTTGATCGCTGGACGTATACCAGGAAGGACGGACAATGACATAAAAAATTA CTGGAACGTTCACCTGAGCAAAAAGCTTATCGACCAGGGCATAGATCCTCGCACACACAGGCCCCTCTCCGAATC…
ClMYB21	768	255	29078.4	7.16	40.38	71.57	-0.855	ATGGGAAGAGCCCCTTGCTGTGACAATGGTGACAGAAACAAGGGAGCCTGGACTTCAGAAGAAGATGAAAGGCTTATTCA ATATATTCAAGCCCATGGAGAAGGCTGCTGGCGTTCCCTCCCTAGGGCTGCAGGTCTTCTTCGGTGTGGCAAGAGTTGCA GGCTAAGATGGATAAATTATCTGCGCCCTGACCTCAAGAGGGGTAATTTCTCTGAAGAGGAAGAGGATCTCATTTTCAAA CTACATGCCCTTCTTGGGAACAAGTGGTCTCTCATAGCCGGTCGACTACCTGGACGAACGGATAACGAGATAAAAAACTA CTGGAACTCACATCTGAAAAGAAAACTGCTTAGTAGGGGCGTCGACCCGAAGACCCATCGACCCTTTTACAAAAC…
ClMYB22	1113	370	42066.5	5.35	54.72	63.54	-0.796	ATGGGGCGTACTCCTTGCTGTTCGAAAATGGGTCTCAACAAAGGGCCCTGGACTACCCAGGAAGATGCACTTCTCACAGA GTACGTACAACAACACGGTGAAGGCGGCTGGAGAACACTTCCTAAGAAAGCAGGTTTGCAGCGATGTGGAAAGAGCTGCA GATTGCGATGGATGAATTACCTGCGCCCAGATGTAAAAAGAGGCCAAATTCTGCCTGATGAAGAAGACCTCATTCTCCGA TTGCACCGTCTTCTGGGTAACAGGTGGTCTTTAATAGCGGGACGTATACCTGGGCGGACTGATAACGAGATCAAGAACTT CTGGAATACCCACCTTAGCAGAAAACTTATAAGTCAGGGCATTGATCCTCGAACCCACAAGCCCCTTTCTGAATC…
ClMYB23	1200	399	45215.4	5.9	59.3	66.99	-0.767	ATGGGTCGAACTCCTTGCTGTACGAAAGTGGGTCTGAACAGAGGTCCATGGACTCCCGAGGAAGACGATCTTCTTGCTAA GTATCTCCAAAAACACGGCGAAGGAGGTTGGAGAACACTTCCTAAGAAAGCAGGTTTGCTTCGATGTGGTAAGAGCTGCA GATTGCGATGGATGAATTACCTGCGACCTGATGTGAAAAGAGGCCAAATTCTGCCCGATGAAGAAGACATCATTCTCAGG TTGCACCGCCTTCTGGGTAACAGGTGGTCTCTAATAGCGGGACGTATACCTGGGCGGACTGATAATGAGATCAAGAACTT CTGGAATACCCATCTTAGCAGAAAACTTGTGAGTCAAGGCATTGATCCTCGAACCCACAAACCCCTTTCTGAATC…
ClMYB24	900	299	33761.3	5.92	52.2	75.08	-0.445	ATGGGTTGCAGGTCTTGTTGCCGTCAGAACAAATATAAGAAGGGACTGTGGTCTCCTGAGGAGGACAAAAAGTTAATAGC TTACATTACCAACTATGGCCATGGATGTTGGAGCACAGTGCCCAAGTTAGCCGGTCTGCAGAGATGTGGGAAAAGTTGCA GACTGAGATGGATAAACTACTTGAGACCTGGCCTGAAACGAGGTGCCTTCTCCCTCTTTGAAGAGAAGTTCATCATTGAA GCACAGGCAGTCCTTGGAAACAGGTGGTCCATGATCGCCAAGCTACTTCCTGGCCGAACAGACAACGAGATTAAAAATTT TTGGAATTCTTGCATTAAGAAGAAGCTTATTTATATGGGCAATGATCCCAACAAACACAGATGCAATGTTTCCTC…
ClMYB25	1182	393	44521.4	5.61	49.67	65.78	-0.735	ATGGGGCGTACGCCTTGCTGTTCGAAGGTTGGTCTCAACAGAGGCCCATGGACTCCCGAGGAAGACGATCTTCTAGCACA GTATATACAAAAGCACGGTGAAGGCGGCTGGAGAACGCTTCCTAAGAAAGCAGGTTTGATGCGATGCGGAAAGAGCTGCA GATTGCGATGGATGAATTACCTGCGACCTGATGTTAAAAGAGGCCGGATTTTGCCCGATGAAGAAGACATCATTCTCAGA TTGCACCGTCTTCTGGGTAACAGGTGGTCTCTAATCGCAGGACGTATACCTGGCCGGACCGATAACGAGATTAAGAACTT CTGGAATACCCACCTTAGCAAAAAACTTGTAAGTCAGGGCATTGATCCTCGAACCCACAGACCCCTTTCTGAATC…
ClMYB26	1260	419	47598.2	5.93	57.26	67.68	-0.693	ATGGGAAGGCACTTGTGCTGCAACCAACAGAAAGTGAAACGAGGGCTATGGTCTCCTGAGGAGGATGAGAAGCTCATGAA TTACATCAATAATAATGGACATGGCTGCTGGAGTGAAGTTCCTGAGAAATCAGGTCTCCAACGTTGTGGGAAAAGTTGCA GATTAAGATGGATCAATTACCTGAGACCTGATATCAGGAGAGGAAATTTCACTCCTCATGAAGAGAAACTTATCATTCAT CTCCACAAAATGGTGGGAAACAGGTGGGCCTACATAGCCTCCCATTTACCAGGGAGGACCGATAATGAGATAAAAAATTA CTGGAATTCTTGGATAAAGAAGAAACTAGCCAAGGCTGAGAAAATCTCAGTGACTGAGGCCTCCAAACATAAGCT…
ClMYB27	1452	483	53262.7	5.36	52.87	72.36	-0.58	ATGGGCCGCCATTCCTGTTGCTACAAGCAGAAGCTTAGAAAGGGGTTGTGGTCTCCTGAGGAGGATGAGAAGCTGTTAAG GCATATTACAAAATATGGCCATGGGTGCTGGAGTGCTGTGCCCAAGCAAGCTGGTCTTCAACGATGTGGGAAAAGTTGCA GGCTGAGATGGATCAACTACTTAAGACCGGATCTGAAGAGAGGTTCCTTCAGTCCACAGGAAGAAAATCTTATCATTGAA CTGCATGCACTTCTTGGCAACAGGTGGTCTCAGATAGCAACCCAGTTGCCTGGAAGGACTGACAATGAGATAAAGAACTT GTGGAATTCATGTATTAAGAAGAAGCTGAGACAACGTGGTATTGATCCTATTACTCACAGGCCTCTCTCTGAGAT…
ClMYB28	1362	453	50597.6	6.28	48.43	67.11	-0.668	ATGGGGAGAAGTCCTTGTTGCGATGAGAACGGACTGAAAAAGGGTCCATGGACACCCGAAGAGGATGAAAAACTTATCCA ATACATACAGAAGCACGGCCATGGCAGTTGGCGCGCTTTGCCTAAGCATGCAGGCTTGCTCAGATGTGGCAAAAGCTGTA GGCTTCGTTGGACGAACTACTTAAGACCCGACATAAAACGGGGAAAATTCTCGTTTGAAGAGGAGCAGACTATACTTCAC CTCCATGCGATGCTGGGAAACAAGTGGTCTGCAATAGCTGCTCATCTGCCTGGAAGGACAGATAACGAGATCAAGAACTA CTGGAACACCCATTTGAAGAAACGGTTGCTCCAGATGGGTATCGATCCCATGACCCACAGGCCACGCACAGATCT…
ClMYB29	1014	337	36400.6	8.88	66.94	63.8	-0.543	ATGGCGGACGAAGCCAGAGCTACAGCTACAGCGGAGCGGATAAAAGGCCCCTGGAGCCCCGAGGAAGACTCAGCGCTTCA GGGTCTGGTGGAGAAATACGGCGCACGCAACTGGTCGATGATAAGCAAGGGGATTCCAGGGCGCTCTGGGAAGTCTTGCA GGTTGCGATGGTGCAACCAGCTCTGCCCTCGGGTCGAGCACCGCCCTTTCTCCGCCGCTGAGGACTCCGCCATTATCGAA GCTCATCTCCGCCATGGCAACAAGTGGGCAACGATCGCGCGCCTCCTTCCAGGCCGGACCGACAACGCTGTGAAAAACCA TTGGAATTCCACCCTCCGCCGCCGCTACCTGCAACAGCACACTCATAATCTTAGCAGGAAGCGAAGCGGCATTTT…
ClMYB30	1035	344	39113.8	5.91	56.45	74.3	-0.742	ATGGGTAGAGCTCCTTGCTGTTCAAAAGATGCAGGCCTCAATCGTGGGGCCTGGACTGCTGAGGAAGATTTGATTTTGAG TGAATACATAGCAATTCATGGCGATGGTGGATGGAGATCTCTCCCACAAAAAGCAGGTCTGAAGCGATGTGGAAAAAGTT GTAGATTGCGTTGGTTGAACTATCTCCGTCCAGACATTAAGCGGGGAAACATTTCCCTTGAAGAAGAGGAGCTCATTATG AGAATGCATAAACTCCTTGGCAATAGATGGTCTCTCATTGCTGGGCGACTGCCTGGTCGAACAGATAACGAAATCAAGAA TTACTGGAATACTCGCTTGTTCAGGAAGGCCGATAACAAAGGATCCAGAGCTCCCCAAGTCAAAAAATTCAGTAG…
ClMYB31	918	305	34576.9	8.93	66.79	71.28	-0.773	ATGGGTAGGTCTGCTTACTGTTCAAAAGATGCAGACCTCAAACGAGGCGCTTGGACTGCCCAGGAAGATTTTATTTTAAG GGAATACATAACAATGCATGGCGACGGTGGATGGAGATCTCTTCCTCAAAAAGCGGGTCTGAAGCGGTGCGGGAAGAGTT GTAGATTGCGTTGGTTGAACTATCTCCGTGCCGATATTAACCACGGAAATATTTCCCCTGACGAAGAGGAGCTCATTGTT AGATTGCATCGCCTCCTTGGCAATAGATGGTCGCTAATTGCAGGAAGACTGCCAGGGCGAACGGACAATCAAATCAAGAA TTACTGGAACATTCATCTGAGCAAGAAGCAGAAGGGAGAGAAGAAAACTCTTCCCAGTTCCCCCACAAGATCGAA…
ClMYB32	1098	365	41443.4	5.64	44.51	67.32	-0.737	ATGGGTAGGGCTCCTTGCTGTTCGAAAGATGCAGGTCTTAACCGTGGGGCATGGACTGCAGAAGAAGATTCGATTCTAAC TAAATACATCTCAATTCATGGCGATGGTGGATGGAGATATCTCCCACAGAAAGCAGGTCTGAAGCGGTGTGGGAAAAGCT GTAGATTGCGCTGGTTGAACTATCTCCGACCTGATATTAAGCGGGGAAACATCACAGCAGATGAAGAGGAGCTCATTATC AGAATGCATAAACTACTTGGCAACAGATGGTCTCTAATTGCAGGACGACTGCCTGGTCGAACAGACAACGAGATCAAGAA TTACTGGAACACTCAATTGGTGAAAAAGCTGGAAAATAAAGGATATAGTACTCCGAAAGCAAAAGAAATCAGTAA…
ClMYB33	1005	334	38085.6	6.1	54.47	70.42	-0.779	ATGGGTAGGTCTCCTTGCTGTAATAAAGATTCTGCCTTCAACCGTGGGGCCTGGACTGCCCAGGAAGACATGATTTTGAG AGAATATATCACAAATCATGGGGAGGGAAAATGGAGTTCTGTACCCATAAAAGCAGGCCTGAATCGATGTGGAAAGAGTT GTAGATTGCGATGGATGAACTATCTTCGTCCAGACATTAAGCGCGGGAACATTTCTGCCGATGAGGATGAGCTCATTATT CGACTGCATAGACTTCTTGGTAATAGGTGGTCTTTGATCGCTGGACGACTGCCTGGTCGAACCGACAATGAAATAAAGAA TTACTGGAACACACAACTAAGCAAGAAGAGCCTTTCACACAACCAGCCTCTTCCAAAGCCCAACGCAAAGTCAAA…
ClMYB34	918	306	34564.2	8.35	56.79	79.02	-0.638	ATGGGTAGGTCTCCTTGCTGTAATAAAGATTCTGCCTTCAACCGTGGGGCCTGGACTGCCCAGGAAGACATGATTTTGAG AGAATATATCACAAATCATGGGGAGGGAAAATGGAGTTCTGTACCCATAAAAGCAGGCCTGAATCGATGTGGAAAGAGTT GTAGATTGCGATGGATGAACTATCTTCGTCCAGACATTAAGCGCGGAAACATTTCTGCGGATGAAGATGAACTCATTATT CGATTACATGGACTCCTTGGCAATAGATGGTCTCTGATTGCAGGACGACTTCCTGGTCGATCAGATAATGAAATAAAGAA CTACTGGAACACAAAACTAAGCAAGAAGTGCCTTCCACACAACCAGCCTCTACCAACGCCCAACAGAAAATTAAA…
ClMYB35	1035	344	38928.3	6.67	62.42	66.92	-0.816	ATGGGTAAGGCTCCTTGCTGCTCCAAAAATTCCATGCTCAATCGCGGGGCTTGGACTGCCCAAGAAGATTTTATTTTAAG CGAATACATCAAAATTCATGGAGAGGGCAGATGGCGATCAATCCCCCAAAAAGCAGGTTTGAAGCGGTGCGGAAAGAGTT GTAGATTGCGTTGGTTGAACTATCTCCGTCCTGATATTAAGCGGGGACACATTTCATCCGATGAAGAGGATCTCATCGTT AGATTACATGGACTCCTCGGCAATAGGTGGTCGCTTATTGCTGGACGCCTGCCGAGTCGAACAGACAACGAAATAAAGAA TTTCTGGAACAGTCATCTCAGGAAGAAGATCCAATCACTGCCAGAGAAGGAAGAAACTCTTCACAAGCGTCTCAG…
ClMYB36	993	330	37428.9	7.03	58.36	68.3	-0.788	ATGGGCCGGGCTCCTTGCTGCTCTAAAAGCTCTACGCTTAACCGCGGAGCTTGGACTGCGCAAGAAGATTTTATTTTAAG CGAATACATCAAAATTCATGGAGAGGGTAGCTGGCGATCAATCCCACCAAAAGCAGGTCTGAAGCGGTGCGGAAAGAGTT GTAGATTGCGTTGGTTGAATTATCTTCGTCCTGATATTAAGCGTGGAGACATTTCACCTGATGAAGAGGATCTCATCGTT AGATTGCATGGACTCCTTGGTAATAGGTGGTCACTTATTGCTGGACGGCTGCCGAGTCGAACAGACAACGAAATAAAGAA TTACTGGAACACTCATCTCAGCAAAAAGAGGCAATCACTGCCAGAGAAGAAAACTCTTCGCTTTCGCCCCAGAAA…
ClMYB37	912	303	34527.5	6.72	54.02	70.2	-0.79	ATGGGTAGGGCTCCGTGCTGTTCAAAAGATGCAGATCTCAATCGCGGAGCCTGGACTGCAGAAGAGGATTTGATTTTGAG TGAATACATAGCAAATCATGGCGATGGTGGATGGAGATCTCTCCCACAAAAAGCAGGCCTCAAGCGATGCGGCAAGAGTT GCAGATTGCGTTGGTTGAATTATCTCCGTCCTCATATTAAGCATGAAAACATTTCTCAGGATGAGGAGGAGCTCATTATT AGACTGCATGGACTCCTTGGCAACAGATGGTCACTGATAGCTGGTCGACTGCCTGGTCGAACAGACAACCAAATTAAGAA TTACTGGAACACTCGTCTGAGCAGGAAGCTACCCAAAAACGGATCTACTGCAAGCAAAACACAAAAACTCAACGC…
ClMYB38	1329	442	48573.4	5.94	49.8	70.86	-0.54	ATGGGAAGGGCTCCTTGCTGCGAGAAAGTTGGGCTGAAGAAAGGCCCCTGGACGCCCGAGGAAGACCACAAGCTTGTCAC TTACATTCACGAGCACGGCCATGGAAGTTGGAGAGCTCTTCCTCAGAAAGCTGGACTGTTGAGGTGTGGGAAAAGCTGTA GGTTACGTTGGGCTAACTATCTGAGGCCGGACATTAAGCGGGGCAAATTCAGCGTCCAAGAAGAGCAAACCATTATCCAG CTCCACGCCCTTCTGGGCAACAGGTGGTCCGCCATCGCCACTCACCTCCCCAAACGTACAGACAATGAAATAAAGAACTA CTGGAACACGCATCTGAAGAGAAGGTTGATTCAGATGGGAATCGATCCCGTGACGCACAAGCCACAAGCAAAGTC…
ClMYB39	843	280	32185	6.7	58.52	67.21	-0.724	ATGAGAGCCAGAGTGGAGCACACTTGCTGCAGAAAGCAGGCAATAAAGCGAGGCTTTTGGTCACCTGAGGAAGACAGGAA ACTCATGAGATATATAAGTGTCCATGGCCATGGCTGCTGGTCATCCCTTCCTGATAGAGCTGGGCTACAGCGTTGTGGCA AGAGTTGTAGGCTAAGATGGATGAATTACTTAAGGCCGGGGATTAAACGAGGCAATTTTAGTAAGGAGGAAGAGAGCACC ATCATTTTTCTTCATAAACTCATGGACAATAGGTGGGCACAGATAGCTAAATACTTGCCAGGAAGGACAGACAGTGAAAT AAAGAACTACTGGAACACTTGTCTCAAGAAAAAAGTTGCAAGTAACCATGATAATCAGAGTTTAACCGAGCTCTC…
ClMYB40	867	288	32648.8	5.83	52.83	79.55	-0.524	ATGCGGCATCACACAGCGCATAACTGCTGTGGGAAGCATCCTGTAAAGCGAGGATTTTGGTCGCCTGAAGAAGATATGAA ACTGATTCGTTATGTTTCTTCCCACGGCCATGGCCGCTGGTCTTCTCTTCCTCTCAGAGCTGGATTGCAACGCTGTGGAA AGAGTTGCAGATTGAGGTGGATGAATTACTTGAGGCCTGGAATTAAACGCGGCAATTTCTCCAATGAAGAGGAAAATCTC ATCATCTGTCTTCATGCAATGCTCGACAACAGATGGGCAGAGATAGCAAAACATTTGCCGGGAAGGACAGACACTGAAAT AAAGAACTACTGGCATACTTCTCTCAAGAAAAAGTTACTTTCTAATGAGGGATCTACTGCTACAATTTCTGCATC…
ClMYB41	1557	518	56100.6	6.47	49.15	67.39	-0.473	ATGGCAGGCAGTGACAAAAGTGTTGCAGCAGGAGAGGATGTTGGGGTAAGAGTGAAGAAAGGCCCATGGATATCTGCTGA GGATTCAATTCTGATGGACTTTGTGAACAAACATGGAGAAGGCAACTGGAATGCTGTGCAGAAGTATACGGGGTTATCTC GCTGTGGAAAGAGTTGCAGGCTGAGGTGGGCTAATCATCTGAGACCCAATTTAAAGAAAGGTGCCTTTACTCCTGAGGAG GAGCGTGCCGTTTTGGAGCTCCACGCCAAGCTTGGCAACAAATGGGCTCGAATTGCTGCTCAGCTTCCTGGGAGGACAGA CAACGAGATAAAGAATTACTGGAACACCCGTATCAAGAGAAGGCAACGAGCAGGTCTTCCTCTCTACCCTCCTGA…
ClMYB42	1038	345	39157	5.62	53.32	80.87	-0.616	ATGGGCCGAGCTCCTAAAGATGATAAAATGGGACTTAAGAAAGGTCCCTGGACTGTTCAAGAGGATCGAATACTCGTAGA TTTTGTTCGAAAAAATGGACATGGAAACTGGCGTGCGCTCCCTAAGGAAGCAGGACTTTTGAGATGCGGTAAAAGCTGTC GTCTGCGGTGGATTAATTACCTCAGACCAGACATTAAGCGTGGAAAGTTTAGTTCTGAAGAGGAAGAGACTATTATTAAA CTTCACCAGCTTCTCGGCAACAGGTGGTCGACAATTGCCTCACGCCTGCCTGGAAGGACAGACAACGAGATTAAAAACGT GTGGAACACCCACTTGAAGAAGCGTCTTCTGCAAATGGGAATCGATCCGGTGACCCATGCAGTAACAAAGAATTC…
ClMYB43	1332	443	51023.3	9.91	56.58	77.07	-0.7	ATGAATTCTTCTATGCACTCAGAGTTCCATGGGAATCCTGACAAGGCCAGAGACAGGCATTTTGTTACATGGTCTGAAGA GGAAGATAACATACTTCGGGAGCAGGTCAGGATTCATGGAACTGAGAGGTGGTCTGTCATTGCATCTCAGTTAGGGAATA AAACAGGCAGACAATGTAGGAGAAGGTGGAACACATACTTGAGTATACCATATAAAAAAGGTGGCTGGTCACCAGAAGAG GACAAGATCTTGTTTGAGGCACATCAAAAATTTGGCAATCGATGGACAGAGATTGCAAAAGTTGTTCAAGGCAGGACTGA CAATGCTGTCAAAAACCGATTCAATGCATTGCATAGAAAGCTAGAGAAAAGGAAATCGTCCAAAGAGAACGATGA…
ClMYB44	1131	376	41674.3	6.52	43.58	62.98	-0.61	ATGAAAGGGAAAAACAGGAAAAGAATGAGCACAGAGGGATCATCCTGTTCAAAAAAAGACAGTAAAATGTTGAAGAAAGG GCCATGGACGGCTTCAGAAGATGAAATTTTGGTGGCTTACGTGAAGGAGAATGGAGAGGGGAACTGGAATTCTGTGCAGA AACATTCTGGTTTGTTTCGCTGTGGAAAGAGTTGCAGGCTTCGATGGGCTAACCATCTGCGCCCAAATCTCAAAAAGGGC GCCTTTTCCCCTGAAGAAGAGCGGTTCATAATGGAGCTGCATCACAAGCTTGGCAACAAGTGGGCTCGAATGGCCGCCTT GATGCCTGGGCGCACAGATAATGAAATAAAGAACTATTGGAATACACGAATCAAGAGGAGGATGCGCTTGGGACT…
ClMYB45	1320	439	49557.4	6.8	48.79	70.02	-0.678	ATGAATTCAAATGTCATGCAGCAACAACAGATACCTAAGCATGTGGGGAGGACTCCATGCTGCTCTAAAATAGGCCTCAA CAGAGGGCCATGGACTCCAGATGAAGATCTCCTTCTTACCAAATACATTCAGGCATTTGGTGAAGGCCGATGGAGAACTT TACCAAAGAAAGCAGGTTTGCAGAGATGTGGCAAAAGTTGTCGATTGAGATGGATGAATTACCTACGACCAGATGTGAAA AGAGGATACATTTCACCTGATGAGGAAGACCTAATTCTCAGGTTGCACCGGCTCCTTGGTAACAGGTGGTCTCTGATAGC AGGGCGTATACCTGGGCGAACTGATAATGAGATAAAGAATTACTGGAACACCCATCTAAGCAAACAGCTTATAAG…
ClMYB46	657	218	25298.6	6.3	56.41	76.61	-0.606	ATGCGGTATCAGAGAATTCATAATTGCTGTAGCAAGAGGCCTGTAAAGAGAGGTCTTTGGTCCCCAGATGAAGATTGGAA ACTCACTAGATATATCCATGGTCATGGAGCAGGGAATTGGCCATCTCTTCCTGACAGAGCTGGATTGGAGCGTTGTGGCA AGAGGTGCAGGCTCAGATGGATGAATTACCTGAGGCCTGGCATTAAACGGGGGGAATTCTCTGCAGAGGAAGAGAACACC ATCATCTTCCTTCATACTCTTTTGGATAACAGATGGGCACAGATTGCTAGGCATTTGCCAGGAAGGACTGACAGTGAAAT CAAGAACTACTGGCACAGTCGCCTTAAGAGAAAGGAGGTTTTTCCTTCTATTTCTGCTGATGATGCTTTGAACTC…
ClMYB47	1791	596	64123.9	5.79	51.21	59.82	-0.616	ATGTTTGGCTGTGATGGTGATTCAGCAACCAGAGGGAAAATGAGTTCAACGACGAGTGAGAGTGGTGCTGGGAAGGATCA GAAAACATTGGAAGGAGGGGATTCTGGAGGTGGGTCTCTGAAAAAGGGGCCATGGACATCTGCAGAGGATGCAATACTGG TTGAATATGTGAAAAAACATGGAGAGGGGAATTGGAATGCAGTGCAGAAGCATTCAGGGCTGTATCGCTGTGGAAAGAGC TGTAGGCTTCGGTGGGCTAATCATCTCAGGCCTAATCTCAAGAAGGGCGCTTTTACTGCAGATGAGGAGCAGATCATAAT TGAGCTTCATGCCAAGCTCGGCAACAAGTGGGCGCGCATGGCTGCTCAGCTGCCTGGGCGTACTGATAACGAGAT…
ClMYB48	738	245	27926.2	5.66	65.11	66.16	-0.736	ATGATGGCCAAAACAGAGAGTTGCAGAATTGAAGAACAGGAAGAAGAAAGCATGAGGAGAGGTCCAGGGACATCAGAGGA GGATATGAGCCTCATTCGCTGCATATCTGTCCGCGGCGAAGGTCGTTGGAATACGATAGCCAAATACGCAGGATTAAGGA GAACTGGAAAAAGCTGCAGATTGAGATGGCTAAACTATCTGAGCCCTGGAGTTAAGCGAGGCAACATAACACAAGAGGAA CAGCTTTTGATCTTGGAACTCCATGGGAAGTGGGGTAATCGATGGTCCAAAATTGCAAGGCATCTTCCTGGAAGAACAGA TAATGAAATCAAGAACTTCTGGAGAACCCGCATGAATAAAGCACATGCTCAGTACAGAGCCATGAGTAGCTATTC…
ClMYB49	1248	415	46782.6	5.25	48.89	55.52	-0.814	ATGAGCTCCACAGATCAACCCAAACCCAAACTCAGAAAAGGCCTTTGGTCACCTGAAGAAGATGATAAGCTCATCAATTA TATGATGAAAAATGGGCAGGGCTGTTGGAGCGATGTTGCAAAACAAGCTGGTCTGCAGAGATGTGGAAAGAGCTGTAGGC TGAGATGGATTAACTACCTCAGGCCTGACCTCAAACGAGGAGCATTTTCACCCCATGAAGAGCAATTGATTATTCACTTA CATTCCATTCTGGGCAACAGGTGGTCTCAGATTGCAGCACGTTTGCCTGGACGTACAGACAACGAGATCAAGAATTTCTG GAATTCCTGCATTAAAAAGAAATTGAAGCACCTCAACAACAACAACCATCATAAATCCACCACCTCAAATACCTC…
ClMYB50	1308	435	49364.6	6.33	50.39	54.76	-0.744	ATGTTTGAGTTTATGGGGAATGATGAAGGTTTTCTTGGAGGAGGAAGATGTATGTCTGGTGAAAGCGAAAGCAGAAGTGA GATTGCCTTCCAGCAGGTGCTTAGATCTACTTGGGAACAACACCAGCAGGAGGCCTGGGCTATGGAGACTAGTTCTAGTC GCCTGAATACCAGCGATGACAACTGTTCCAGCCATGAGGATTATTGTATTAAGGATTCAGAAAATTGCAATGAGAAAGAA GTGGTAGACTCGACCTTAAAGTCAAGACTGTGTGCTAGAGGGCATTGGAGGCCAGCTGAGGATGCCAAGCTCAAGGAGTT GGTGGTCCAATATGGACCTCAGAACTGGAATCTCATTGCAGACAAACTCCATGGCAGATCTGGAAAGAGTTGTAG…
ClMYB51	1044	347	38194.2	5.6	37.62	76.74	-0.401	ATGGGGAGACAACCTTGTTGTGATAAGGTGGGGGTGAAGAAAGGGCCATGGACTGCAGAAGAAGATAGGAAACTTGTGGA TTTTCTTGCCAACAATGGCCATTGCTGCTGGCGTACTGTTCCTAAACTTGCTGGACTATCGAGATGTGGGAAAAGTTGTA GGCTGAGATGGACAAATTACCTGCGGCCTGATCTTAAACGAGGAGTTTTATCAGACATGGAAGAAAAAGTTATCATTGAG CTCCATTCTCACCTTGGCAATAGGTGGGCCAAGATTGCAGCGCATCTGCCTGGGCGCACTGATAATGAAATAAAGAATTA CTGGAACACCCACATCAAGAAAAAGCTGAAGCGCATGGGAATCGACCCTCTGACCCATCAGCCCATTGCAGATAC…
ClMYB52	1215	404	44543.2	6.36	54.77	65.54	-0.662	ATGGGCAGAGCACCTTGCTGTGATAAAGCAAATGTGAAGAGAGGACCATGGTCTCCTGAAGAAGATGCCATACTCAAACA TTTTGTTGAGAAGCATGGAACTGGAGGCAATTGGATTGCTTTGCCTCACAAAGCTGGGTTGAGAAGGTGCGGTAAGAGTT GCAGACTAAGATGGTTGAACTATCTAAGGCCTGATATAAAACATGGAGGCTTTTCAGAAGAAGAAGATGCAATCATCTGC AGCCTCTACAGCAGCATTGGAAGCAGATGGTCCATAATTGCAGCGCAGCTGCCTGGCCGAACAGATAACGATATCAAGAA TTACTGGAATACAAAGCTAAAGAAAAAATTGCTTGGCAAAGGCGTCAAGGATGATCAGCAAACCAGGCGTCTACT…
