# Supplementary material for: Full-length transcriptomic identification of R2R3-MYB family genes related to secondary cell wall development in Cunninghamia lanceolata (Chinese fir)
Source: BMC Plant Biol. 2021 Dec 8;21:581. doi: 10.1186/s12870-021-03322-w (PMC8653563; doi:10.1186/s12870-021-03322-w)
Supplement: Supplementary file 6 — Additional file 6: Table S3. FPKM values of 52 ClMYB genes in different organs or tissues. [file 12870_2021_3322_MOESM6_ESM.xlsx]

## Sheet: Sheet1
Full-length transcriptomic identification of R2R3-MYB family genes related to secondary cell wall development in Cunninghamia lanceolata (Chinese fir)
Hebi Zhuang1§, Sun-Li Chong1§, Borah Priyanka1, Xiao Han1, Erpei Lin1, Zaikang Tong1, Huahong Huang1*
1State Key Laboratory of Subtropical Silviculture, Zhejiang A&F University, Lin'an, Hangzhou 311300, China
§These authors contributed equally to this work.
Table S3: FPKM values of 52 ClMYB genes in different organs or tissues.
Gene	FC				MC				L				RT				S1				S2				S3				S4				S5				X				B
	repeat 1	repeat 2	repeat 3	mean	repeat 1	repeat 2	repeat 3	mean	repeat 1	repeat 2	repeat 3	mean	repeat 1	repeat 2	repeat 3	mean	repeat 1	repeat 2	repeat 3	mean	repeat 1	repeat 2	repeat 3	mean	repeat 1	repeat 2	repeat 3	mean	repeat 1	repeat 2	repeat 3	mean	repeat 1	repeat 2	repeat 3	mean	repeat 1	repeat 2	repeat 3	mean	repeat 1	repeat 2	repeat 3	mean
ClMYB1	1.23	1.11	1.17	1.17	3.52	2.56	3.52	3.2	22.6	23.86	23	23.1533	5.34	3.6	2.73	3.89	12.73	14.22	14.03	13.66	16.82	16.55	13.02	15.4633	18.31	16.94	18.82	18.0233	18.19	16.34	17.76	17.43	24.29	23.38	24.66	24.11	17.64	25.54	24.32	22.5	4.46	4.66	3.57	4.23
ClMYB2	7.42	8.14	8.64	8.06667	0.07	0.08	0.07	0.0733333	0.32	0.07	0.25	0.213333	0.45	0.63	0.54	0.54	0.29	0.34	0.51	0.38	1.53	0.97	1.16	1.22	1.72	2.04	2.06	1.94	2.5	3.13	2.78	2.80333	3.12	3.02	1.13	2.42333	4.76	4.02	3.81	4.19667	0.13	0.12	0.04	0.0966667
ClMYB3	3.06	3.61	3.07	3.24667	2.53	2.72	2.45	2.56667	0.81	0.83	0.82	0.82	10.78	11.41	9.61	10.6	12.02	11.78	11.06	11.62	7.7	8.64	8.94	8.42667	8.62	9.12	8.82	8.85333	4.25	4.22	3.81	4.09333	1.54	1.45	1.51	1.5	6.99	5.95	6.25	6.39667	3.4	3.01	2.84	3.08333
ClMYB4	159.96	167.24	163.69	163.63	8.11	8.49	8.52	8.37333	11.57	12.64	11.53	11.9133	11.07	12.11	12.88	12.02	19.66	20.86	19.43	19.9833	12.59	13.69	11.87	12.7167	8.56	8.8	7.37	8.24333	6.94	5.14	8.49	6.85667	6.18	4.44	3.53	4.71667	15.7	14.15	14.05	14.6333	1.69	1.94	1.94	1.85667
ClMYB5	16.3	13.93	17.03	15.7533	34.85	32.46	36.97	34.76	30.7	26.34	26.93	27.99	99.67	105.85	105.67	103.73	67.65	66.75	68.84	67.7467	59.83	69.41	67.91	65.7167	63.41	65.15	65.66	64.74	56.31	49.59	49.4	51.7667	45.89	46.56	48.86	47.1033	62.98	70.87	67.47	67.1067	55.37	57.95	63.73	59.0167
ClMYB6	5.19	4.54	3.79	4.50667	46.33	48.66	46.13	47.04	5.01	5.49	4.91	5.13667	15.36	15.15	14.2	14.9033	24.4	27.12	22.93	24.8167	27.98	27.82	29.25	28.35	26.73	24.25	22.57	24.5167	17.41	18.94	19.44	18.5967	17.17	16.35	23.15	18.89	0.65	0.39	0	0.346667	13.41	12.09	10.29	11.93
ClMYB7	0.76	1.39	0.76	0.97	7.61	7.67	8.49	7.92333	0.82	0.93	1.18	0.976667	0	0	0	0	4.88	4.63	3.9	4.47	5.33	5.7	5.79	5.60667	6.55	7.89	7.16	7.2	5.15	6.3	5.43	5.62667	4.99	7.15	15.63	9.25667	0.2	0.39	0.47	0.353333	7.84	7.86	7.95	7.88333
ClMYB8	14.48	14.26	13.82	14.1867	4.51	3.68	4.83	4.34	15.98	16.83	16.73	16.5133	3.58	4.82	4.65	4.35	29.58	25.82	26.73	27.3767	26.75	29.14	26.02	27.3033	26.78	24.48	26.56	25.94	19.17	16.86	18.62	18.2167	15.84	16.11	17.83	16.5933	15.59	13.12	14.03	14.2467	19.74	21.11	18.42	19.7567
ClMYB9	62.96	61.98	57.86	60.9333	130.96	138.58	145.24	138.26	51.14	56.44	56.6	54.7267	91.15	90.89	88.12	90.0533	150.55	152.38	155.9	152.943	137.92	148.11	141.71	142.58	159.72	160.13	152.51	157.453	130.33	132.13	139.15	133.87	121.21	119.73	194.8	145.247	84.38	89.13	86.14	86.55	174.1	173.91	166.99	171.667
ClMYB10	63.95	62.03	63.19	63.0567	11.9	11.8	11.82	11.84	12.4	14.46	12.59	13.15	4.31	4.46	5.31	4.69333	23.22	27.54	24.55	25.1033	6.27	8.42	7.27	7.32	1.38	1.69	1.99	1.68667	1.33	1.78	1.34	1.48333	1.51	1.62	1.67	1.6	2.94	1.83	2.21	2.32667	0.78	0.7	0.67	0.716667
ClMYB11	50.44	54.87	52.95	52.7533	23.11	22.31	24.08	23.1667	19.88	19.29	21.63	20.2667	16.3	16.4	15.99	16.23	59.42	58.48	61.47	59.79	56.14	56.48	58.72	57.1133	50.3	47.41	51.76	49.8233	45.02	47.95	48.38	47.1167	41.7	42.97	41.39	42.02	65.12	62.23	61.72	63.0233	63.99	66.33	62.75	64.3567
ClMYB12	0.4	0.21	1.08	0.563333	0	0	0	0	0.13	0.06	0.23	0.14	22.05	18.87	19.72	20.2133	2.78	2.7	2.39	2.62333	7.56	7.93	7.59	7.69333	8.52	9.29	9.69	9.16667	8.81	6.28	7.18	7.42333	4.91	5.8	6.9	5.87	41.41	42.36	44.88	42.8833	6.95	5.75	6.25	6.31667
ClMYB13	1.28	1.39	1.52	1.39667	0.95	1.16	1.01	1.04	12.02	11.78	11.03	11.61	21.19	20.73	19.14	20.3533	34.82	33.28	37.59	35.23	31.98	36.91	39.19	36.0267	28.08	32.32	34.28	31.56	45.15	42.33	45.13	44.2033	41.23	43.13	40.89	41.75	96.85	97.75	97.71	97.4367	74.17	71.8	71.82	72.5967
ClMYB14	0.39	1.12	1.06	0.856667	5.05	4.27	4.83	4.71667	2.56	2.03	2.46	2.35	1.42	1.75	1.44	1.53667	2.63	1.93	0.68	1.74667	1.41	1.08	1.6	1.36333	1.3	1.17	1.55	1.34	1.8	1.42	1.49	1.57	1.81	1.35	0.74	1.3	0.29	0.72	0.78	0.596667	1.02	1.8	0.98	1.26667
ClMYB15	6.28	5.41	6.19	5.96	0.27	0.06	0	0.11	0.21	0	0.06	0.09	6	6.48	7.6	6.69333	0	0.22	0.33	0.183333	0.97	0.77	1.53	1.09	3.18	2.77	2.57	2.84	2.53	2.13	2.64	2.43333	1.19	2.27	1.51	1.65667	2.04	2.6	1.91	2.18333	1.88	2.41	2.72	2.33667
ClMYB16	2.71	3.21	2.44	2.78667	18.72	16.51	18.26	17.83	0.69	0.41	0.92	0.673333	4.15	3.87	5	4.34	7.01	6.56	5.01	6.19333	6.4	7.31	6.41	6.70667	6.33	4.18	6.83	5.78	4.23	4.31	4.82	4.45333	2.91	2.97	5.16	3.68	5.94	8.75	6.48	7.05667	3.17	2.44	2	2.53667
ClMYB17	9.69	9.71	10.14	9.84667	4.01	5.37	3.51	4.29667	11.12	11.83	11.94	11.63	27.15	27.24	25.82	26.7367	7.87	9.62	6.66	8.05	14.69	17.07	16.61	16.1233	20.48	18.32	15.67	18.1567	10.64	12.15	11.95	11.58	9.48	10.96	6.31	8.91667	5.16	5.05	4.19	4.8	10.08	5.44	6.72	7.41333
ClMYB18	0.12	0	0	0.04	10.08	11.04	9.01	10.0433	1.17	2.45	1.34	1.65333	3.37	5.26	4.08	4.23667	0.95	1.02	0.82	0.93	0.07	0.21	0.07	0.116667	0.06	0	0	0.02	0	0	0	0	0	0	0	0	0	0	0	0	0	0	0	0
ClMYB19	0.07	0.09	0.05	0.07	1.22	1.23	1.43	1.29333	0.09	0.26	0.22	0.19	0.39	0.76	0.58	0.576667	2.08	1.48	1.92	1.82667	0.68	0.83	0.6	0.703333	0.31	0.46	0.28	0.35	0.27	0.17	0.24	0.226667	0.18	0.12	0.3	0.2	0.04	0	0	0.0133333	0.11	0.18	0.07	0.12
ClMYB20	0.59	0.6	0.52	0.57	0.64	0.67	0.67	0.66	0.33	0.26	0.4	0.33	3.51	3.72	3.89	3.70667	4.25	3.03	2.94	3.40667	1.62	1.57	2.99	2.06	1.61	1.85	2.23	1.89667	2.15	3.58	3.24	2.99	3.67	2.26	3.16	3.03	0.92	2.01	2.2	1.71	3.6	3.61	3.24	3.48333
ClMYB21	1.69	1.92	1.67	1.76	65.54	70.5	72.07	69.37	49.28	53.31	51.47	51.3533	18.49	19.63	15.5	17.8733	37.9	39.24	38.37	38.5033	37.15	37.3	36.01	36.82	36.81	38.35	38.54	37.9	39.34	33.63	37.79	36.92	37.11	41.2	40.08	39.4633	25.41	27.1	25.89	26.1333	37	28.6	31.79	32.4633
ClMYB22	32.93	30.49	30.49	31.3033	1.76	1.88	1.84	1.82667	2.49	2.91	2.17	2.52333	1.13	0.96	1.3	1.13	3	3.69	3.09	3.26	2.03	1.96	2.04	2.01	1.1	0.96	1.33	1.13	1.01	0.63	1.17	0.936667	1.22	0.91	0.64	0.923333	0.24	0.17	0.06	0.156667	0.12	0.69	1.31	0.706667
ClMYB23	20.24	16.26	19.08	18.5267	1.49	2.81	3.6	2.63333	7	8.75	7.52	7.75667	8.11	7.35	6.12	7.19333	7.78	6.79	8.4	7.65667	6.68	6.37	7.64	6.89667	7.45	6.58	6.87	6.96667	9.3	8.67	8.62	8.86333	8.5	8.48	10.49	9.15667	2.11	2.61	1.88	2.2	7.03	5.85	7.87	6.91667
ClMYB24	0	0	0	0	0.39	0.07	0.3	0.253333	0.51	0.4	0.3	0.403333	0.09	0	0	0.03	0	0	0.1	0.0333333	0.28	0.43	0.09	0.153333	0.08	0.29	0.09	0.266667	0.38	0.15	0.4	0.31	0.32	0.66	1.04	0.673333	1.6	1.16	0.71	1.15667	0.8	0.1	0.77	0.556667
ClMYB25	13.2	15.51	12.81	13.84	7.66	6.59	5.83	6.69333	8.67	8.13	7.98	8.26	6.97	5.59	5.41	5.99	6.73	7.58	7.84	7.38333	7	5.39	6.64	6.34333	5.24	5.95	4.85	5.34667	5.21	5.66	5.03	5.3	6.71	6.62	3.12	5.48333	4.3	4.1	4.43	4.27667	3.92	4.45	4.53	4.3
ClMYB26	0	0	0	0	6.71	4.85	4.68	5.41333	1.96	2.09	2.22	2.09	0	0.06	0.12	0.06	1.78	1.98	2.27	2.01	2	2.36	2.74	2.36667	2.39	2.83	2.87	2.69667	5.2	5.42	3.7	4.77333	3.66	3.89	2.01	3.18667	5.81	8.37	6.98	7.05333	1.19	1.55	1.6	1.44667
ClMYB27	0.65	0.72	0.49	0.62	3.46	3.37	3.37	3.4	0.16	0.41	0.27	0.28	0.05	0.28	0	0.11	6.93	6.8	7.8	7.17667	7.39	5.81	7.16	6.78667	5.05	5.34	5.9	5.43	6.99	5.85	7.42	6.75333	8.12	6.06	3.78	5.98667	17.62	17.57	18.02	17.7367	1.4	1.53	0.87	1.26667
ClMYB28	0.47	0.57	0.34	0.46	0	0.13	0	0.0433333	0.61	0.42	0.61	0.546667	3.69	4.04	5.19	4.30667	0.75	0.48	0.63	0.62	3.86	3.16	3.13	3.38333	3.47	3.79	3.79	3.68333	5.95	4.7	5.17	5.27333	5.49	4.67	5.18	5.11333	2.06	2.26	1.7	2.00667	2.72	1.91	2.77	2.46667
ClMYB29	2.68	3.2	1.83	2.57	5.64	6.08	6.07	5.93	1.1	0.77	1.22	1.03	3.46	4.78	2.68	3.64	6.54	6.96	7.58	7.02667	8.77	8.1	8.86	8.57667	9.24	10	9.08	9.44	8.66	10.4	10.38	9.81333	7.89	7.52	10.39	8.6	22.89	21.01	26.21	23.37	16.29	15.16	13.41	14.9533
ClMYB30	0.2	0.12	0.21	0.176667	32.14	32.06	30.55	31.5833	0.4	1.24	1.18	0.94	0.67	0.66	0.33	0.553333	1.8	1.78	1.85	1.81	3.42	4.18	1.94	3.18	4.76	3.51	3.69	3.98667	2.28	2.18	2.47	2.31	1.49	1.71	2.72	1.97333	0.54	0.26	0.21	0.336667	0.07	0.13	0.06	0.0866667
ClMYB31	0.37	0.15	0.26	0.26	2.58	2	2.76	2.44667	0.28	0.06	0.18	0.173333	0	0.14	0	0.0466667	1.43	1.39	1.48	1.43333	0.67	0.56	0.36	0.53	0.5	0.54	0.48	0.506667	0.08	0.3	0.33	0.236667	0.13	0.41	0.21	0.25	0	0	0	0	0.08	0	0.08	0.0533333
ClMYB32	1.08	1.42	1.34	1.28	7	6.54	7.16	6.9	1.13	0.25	0.56	0.646667	6.41	5.42	6.12	5.98333	1.94	1.88	1.62	1.81333	4.7	4.54	4.74	4.66	6.25	5.04	6.92	6.07	4.5	4.92	5.12	4.84667	3.91	3.96	4.76	4.21	3.74	4.58	3.96	4.09333	2.46	1.94	1.73	2.04333
ClMYB33	0	0.07	0.06	0.0433333	0	0	0	0	0.07	0	0.06	0.0433333	0.93	0.83	0.54	0.766667	0.23	0.35	0.26	0.28	1.38	1.08	1.2	1.22	2.14	1.34	2.01	1.83	1.38	0.54	1.03	0.983333	1.08	1.12	1.03	1.07667	1.95	1.68	1.66	1.76333	0	0.08	0	0.0266667
ClMYB34	0.05	0	0.05	0.0333333	0.9	0.71	0.68	0.763333	0	0.24	0.23	0.156667	0	0	0	0	1.8	2.05	2.46	2.10333	3.01	3.92	3.88	3.60333	4.25	3.96	3.94	4.05	1.9	1.82	1.82	1.84667	1.04	0.67	1.81	1.17333	2.02	2.69	2.73	2.48	1.1	0.69	0.52	0.77
ClMYB35	1.6	1.62	1.54	1.58667	14.05	13.36	16.15	14.52	6.62	6.46	7.55	6.87667	16.79	15.09	17.21	16.3633	1.45	1.72	1.59	1.58667	1.98	3.64	2.8	2.80667	3.2	3.16	3.45	3.27	3.54	2.88	3.84	3.42	3.87	3.43	3.64	3.64667	0.58	0.36	0.87	0.603333	4.11	5.43	4.45	4.66333
ClMYB36	0.35	0.64	0.61	0.533333	7.26	6.29	5.69	6.41333	1.97	2.4	1.7	2.02333	1	0.83	0.31	0.713333	0.53	0.77	0.7	0.666667	2.84	3.05	2.42	2.77	2.19	2.7	3.62	2.83667	1.45	1.68	2.51	1.88	1.19	1.95	1.64	1.59333	0	0.07	0.24	0.103333	0.54	0.52	0.37	0.476667
ClMYB37	19.35	21.68	20.91	20.6467	0.93	1.23	0.78	0.98	2.29	3.33	2.97	2.86333	7.79	7.51	8.74	8.01333	0.88	1.63	1.16	1.22333	11.16	9.04	10.17	10.1233	9.61	9.79	10.23	9.87667	8.36	6.78	7.54	7.56	6.05	8.47	9.31	7.94333	2.21	2.29	2.74	2.41333	2.7	3.74	3.35	3.26333
ClMYB38	16.93	17.22	16.23	16.7933	30.68	31.13	29.19	30.3333	1.45	2.09	1.29	1.61	0.05	0.05	0	0.0333333	11.48	12.89	13.43	12.6	3.05	3.27	3.22	3.18	1.68	1.72	1.78	1.72667	1.61	1.61	1.87	1.69667	1.09	1.49	1.01	1.19667	0.16	0.41	0.27	0.28	0.21	0.2	0.71	0.373333
ClMYB39	0	0.21	0	0.07	0.37	0.26	0.36	0.33	29.15	26.88	27.26	27.7633	0	0.07	0	0.0233333	3.19	2.67	2.52	2.79333	4.57	3.76	2.84	3.72333	1.15	0.71	1.16	1.00667	1.63	0.96	0.8	1.13	0.92	1.02	1.21	1.05	0.08	0.15	0	0.0766667	0.45	1.3	0.72	0.823333
ClMYB40	3.46	3.97	3.82	3.75	1.07	0.85	1.29	1.07	2.89	3.6	2.72	3.07	1.5	0.88	0.84	1.07333	5.03	5.28	5.37	5.22667	4.69	4.22	4.11	4.34	4.46	4.27	3.63	4.12	7.62	7.75	6.76	7.37667	5.82	6.74	5.27	5.94333	0.2	0.44	0.33	0.323333	6.56	8.82	8.18	7.85333
ClMYB41	0.86	1.27	1.41	1.18	3.44	2.12	3.34	2.96667	2.64	1.95	1.76	2.11667	1.59	0.79	2.17	1.51667	1.68	1.07	1.51	1.42	0.79	1.23	0.74	0.92	0.63	1.1	0.69	0.806667	1.77	1.74	1.94	1.81667	2.21	1.74	2.47	2.14	0.42	0.4	0.7	0.506667	2.26	2.43	2.13	2.27333
ClMYB42	0	0	0	0	0	0	0	0	0	0.27	0	0.09	1	0.46	0.37	0.61	0	0.16	0	0.0533333	0	0.3	0	0.1	0	0	0.07	0.0233333	0	0.13	0.14	0.09	0.33	0.24	0.23	0.266667	0.26	0	0.13	0.13	0.61	0.49	0.82	0.64
ClMYB43	3.06	3.61	3.28	3.31667	4.6	5.78	5.34	5.24	0.31	0.17	0.24	0.24	1.17	0.97	0.89	1.01	1.4	1.23	1.78	1.47	0.99	0.78	1.39	1.05333	1.4	0.75	0.92	1.02333	1.23	1.37	1.45	1.35	1.55	0.81	0.47	0.943333	0.73	0.79	0.68	0.733333	0.52	1.14	0.37	0.676667
ClMYB44	2.53	2.72	2.42	2.55667	0.18	0.09	0.12	0.13	0.03	0.08	0.19	0.1	0.16	0.06	0.16	0.126667	0.16	0.06	0.1	0.106667	0	0.08	0.11	0.0633333	0	0.21	0.08	0.0966667	0.3	0.19	0.13	0.206667	0.31	0.38	0.7	0.463333	0.6	0.15	0.39	0.38	0.25	0.52	0.39	0.386667
ClMYB45	0.92	0.44	0.84	0.733333	8.31	7.08	6.57	7.32	0.45	0.51	0.48	0.48	0.48	0.62	0.53	0.543333	2.2	2.8	2.38	2.46	0.74	0.92	0.81	0.823333	1.1	0.86	0.77	0.91	0.4	0.16	0.74	0.433333	0.35	0.63	0.29	0.423333	0.69	0.62	0.81	0.706667	0.48	0.92	0.56	0.653333
ClMYB46	1.07	0.4	0.24	0.57	0.26	0.21	0.08	0.183333	0.43	0.4	0.15	0.326667	0.41	0.44	0.4	0.416667	0.3	0.36	0.52	0.393333	0.74	0.56	1.81	1.03667	1.13	1.53	0.96	1.20667	1.62	1.55	1.71	1.62667	2.06	1.11	0.27	1.14667	0.5	0.19	0	0.23	1.43	1.1	1.71	1.41333
ClMYB47	277.87	280.9	283.54	280.77	9.51	8.57	9.29	9.12333	3.69	3.18	3.39	3.42	2.41	2.69	2.37	2.49	5.06	5.16	4.7	4.97333	5.43	4.75	6.34	5.50667	5.54	5.79	5.18	5.50333	6.29	5.88	5.77	5.98	6.19	7.07	5.75	6.33667	3.36	2.71	2.76	2.94333	5.08	4.72	4.28	4.69333
ClMYB48	5.92	4.91	6.2	5.67667	0	0.05	0.12	0.0566667	0.13	0.06	0.3	0.163333	36.78	35.03	30.85	34.22	2.47	1.99	1.67	2.04333	8.71	7.27	8.79	8.25667	9.54	9.63	13.04	10.7367	9.65	10.97	9.03	9.88333	6.64	8.47	10.63	8.58	99.87	90.84	92.62	94.4433	12.26	11.46	10.17	11.2967
ClMYB49	0.97	1.13	1.5	1.2	0.4	0.17	1.02	0.53	1.67	1.08	1.39	1.38	0.73	0.55	1.09	0.79	3.8	3.56	4.41	3.92333	9.86	8.43	10.9	9.73	11.79	11.18	12.56	11.8433	16.34	17.11	15.95	16.4667	16.69	15.27	15.01	15.6567	34.97	38.62	37.89	37.16	3.2	3.34	2.92	3.15333
ClMYB50	4.52	5.55	4.84	4.97	8	8.03	7.8	7.94333	0.13	0.24	0.22	0.196667	2.32	2.35	3.08	2.58333	7.22	7.32	7.31	7.28333	8.62	6.92	8.62	8.05333	5.23	7.39	5.79	6.13667	5.93	5.69	5.38	5.66667	5.26	5.2	5.88	5.44667	10.74	10.34	8.56	9.88	8.13	6.44	8.16	7.57667
ClMYB51	0.13	0.26	0.4	0.263333	3.56	2.12	3.04	2.90667	4.96	4.92	5.44	5.10667	0.79	0.81	0.5	0.7	5.02	6.31	4.47	5.26667	5.57	7.01	6.46	6.34667	8.5	7.81	6.82	7.71	9.03	9.05	7.51	8.53	6.97	5.93	6.27	7.39	65.75	61.33	62.78	63.2867	0.79	0.54	0.59	0.64
ClMYB52	1.3	1.43	1.64	1.45667	1.73	2.5	1.23	1.82	0.48	0.92	0.86	0.753333	16.86	17.23	18.98	17.69	5.66	7.89	6.39	6.64667	5.85	5.33	7.33	6.17	4.99	6.94	6.48	6.13667	6.68	4.73	3.84	5.08333	3.38	4.86	4.04	4.09333	11.81	14.05	13.91	13.2567	3.85	2.84	2.81	3.16667
