# Supplementary material for: Full-length transcriptomic identification of R2R3-MYB family genes related to secondary cell wall development in Cunninghamia lanceolata (Chinese fir)
Source: BMC Plant Biol. 2021 Dec 8;21:581. doi: 10.1186/s12870-021-03322-w (PMC8653563; doi:10.1186/s12870-021-03322-w)
Supplement: Supplementary file 7 — Additional file 7: Data S1. Descriptions and sequence logo plots of motifs in ClMYB proteins. [file 12870_2021_3322_MOESM7_ESM.xlsx]

## Sheet: sheet1
Full-length transcriptomic identification of R2R3-MYB family genes related to secondary cell wall development in Cunninghamia lanceolata (Chinese fir)
Hebi Zhuang1§, Sun-Li Chong1§, Borah Priyanka1, Xiao Han1, Erpei Lin1, Zaikang Tong1, Huahong Huang1*
1State Key Laboratory of Subtropical Silviculture, Zhejiang A&F University, Lin'an, Hangzhou 311300, China
§These authors contributed equally to this work.
Data S1: Descriptions and sequence logo plots of motifs in ClMYB proteins
No.	Legend	Width (aa)	Sites	LLR	E-value
1	1	8	32	646	1.4e-137
MGR[AS]PCC[DS]
2	2	15	22	595	2.4e-92
[SQ][MQR]GIDPRTH[RK]P[LI]SES
3	3	41	8	593	2.8e-044
K[SP][NPS][PS][AS][PDS][PS][EAG]D[DH][RH][VI][FL]K[ST][TV]PV[KR][AT]TAVR[ILV][AS]K[GC]C[NSK]KY[GL][SG][SN][SG][IS]S[DN]HQ
4	4	50	5	538	3.9e-038
[NV][PDN][CINTY][LQ]IP[YFH]S[NE][APV][CTF][AHLP]E[IMNSV]G[LVT][HNQ][DAGN][FHN][DQV][AS][SL][LQ]Y[MLS][RN][ERT][LNG]S[IS][PTR][NE][SF][YD][FV][VC][AT][PS][AT][EMV][LTP][DE][SHR][NVD][LI][QE][SQ][IV][PKNT]S
5	5	16	4	178	1.0e-019
L[ADS][VI]M[RQ]EM[IV]A[KE]EV[QR][NKS]YM
6	6	50	2	291	1.8e-018
MAEHCLISLDYSEYSEAIIPSMKKDDLGLCEAKVSVDSPTRISNF[FS]DTFY
7	7	35	3	267	4.0e-014
[DE][EQ][IA]NK[HD][AV]A[SP]S[LV]SENRQ[QH][FS][LPS][HN][TA]ET[PS]N[QH][HPR][GA]Y[DE][MR]W[SP][MT][MV]
8	8	28	4	262	1.5e-013
GY[LIV][KR][AT][DEQ][ED]A[MI][TEL][MW]M[ST][AES][AV][IV][KNR][MAN][AT][VL][AGS][QH][AT][LI][APS][LP][IMV][FL]
9	9	42	3	315	1.0e-016
A[GMT][ALV][PK][FD][AE][RST][KR][TN][ASV]LGYE[LV][DH][KR]F[RH]V[PF]GA[PS]V[HLQ]Q[TS][AS]N[MT]GN[SF][FM][LP][CFH][FS][SQ][PT]Q[FV]
10	10	33	3	259	1.2e-017
G[FL][LS][GE][GE]GRC[VM]SGES[QE][CS]RSEIAFQQVL[SR][LPS][TS][WT][EQ]Q[QH][QN]
11	11	14	4	152	5.6e-012
[VEG][NG][RGI][PH]FIDFLGVGA[TFQ]
12	12	39	2	223	2.4e-011
EICNNTQQKGNWVEELQYQQNSSLQWLSLLLLESEEDWE
13	13	29	3	223	2.4e-011
[TI][TH][PF][GIS][AT][AIQ][AM][ED][DY][CY][ND]SDIFS[YH]FL[ED]SF[MT]D[DEG][DG]Q[LF][HY]
14	14	49	2	270	9.8e-010
IAHTVQISCESL[FI]KEDNS[DN][NS][HS]NFS[MT]EKN[IN][AV]E[SW][GL]SPSME[IM]NGQYSPCYRP
15	15	29	3	220	3.9e-009
[KN][QE]EI[HIL]MADFFQ[HSY][DQ][HN]S[EN][VA]TS[CSV][FIL][ED][RS][AGV]ASD[AP][AG]
16	16	18	6	227	1.3e-008
DG[KT]DYW[LS]N[FM]LRQ[AV]G[PT]SPT
17	17	12	8	201	1.9e-006
D[PIV][NP][LT][DS]L[SC][IL]SLP[GCS]
