# Supplementary material for: Full-length transcriptomic identification of R2R3-MYB family genes related to secondary cell wall development in Cunninghamia lanceolata (Chinese fir)
Source: BMC Plant Biol. 2021 Dec 8;21:581. doi: 10.1186/s12870-021-03322-w (PMC8653563; doi:10.1186/s12870-021-03322-w)
Supplement: Supplementary file 8 — Additional file 8: Data S2. Tracheid wall thickness of different samples. [file 12870_2021_3322_MOESM8_ESM.xlsx]

## Sheet: Sheet1
Full-length transcriptomic identification of R2R3-MYB family genes related to secondary cell wall development in Cunninghamia lanceolata (Chinese fir)
Hebi Zhuang1§, Sun-Li Chong1§, Borah Priyanka1, Xiao Han1, Erpei Lin1, Zaikang Tong1, Huahong Huang1*
1State Key Laboratory of Subtropical Silviculture, Zhejiang A&F University, Lin'an, Hangzhou 311300, China
§These authors contributed equally to this work.
	Tracheid wall thickness of different samples.
Samples	Double wall thickness of tracheids / μm
	1	2	3	4	5	6	7	8	9	10	11	12	13	14	15	16	17	18	19	20	21	22	23	24	25	26	27	28	29	30	31	32	33	34	35	36	37	38	39	40	41	42	43	44	45	46	47	48	49
CW	4.691	3.941	5.004	3.7885	4.2855	4.2505	4.458	4.0915	3.9765	4.6075	4.8875	5.2585	4.6895	5.544	5.357	4.021	5.4915	5.878	4.5035	5.14	4.42	4.7215	6.425	6.8135	7.241	7.2305	4.88	5.966	5.8825	6.5915	6.8065	8.0345	7.1105	8.018	6.9885	7.6645	8.3545	8.8495	8.2625	7.424	7.761	8.5205	6.8515	6.765	6.341	6.6675	7.306	6.3815	5.4625
CK	4.3785	2.7085	4.5395	3.7215	4.065	3.8765	3.35	4.163	3.8765	3.629	4.5155	3.169	5.541	4.481	3.8435	3.5985	3.0575	3.3785	3.335	4.1555	2.61	3.362	6.4175	3.928	4.0225	3.7315	3.459	3.2675	3.845	4.6445	3.646	4.269	6.1185	4.1115	5.0625	4.0685	3.386	3.3785	3.577	3.529	2.641	5.8785	4.8965	3.5685	4.34	4.9905	3.869	4.3055	3.7285
OW	4.475	3.939	4.746	3.8785	3.8755	4.395	4.372	5.3285	6.298	5.4735	4.0985	5.117	4.403	5.0955	4.115	4.5125	5.2395	5.0665	5.0945	4.6645	4.1505	4.772	4.989	4.1165	3.6355	3.189	4.366	4.935	4.3005	3.7565	3.7625	4.687	4.2145	5.5875	4.8915	4.6335	5.777	4.1225	3.8955	3.275	4.1225	3.9015	3.6715	4.6775	3.674	4.954	3.9835	4.3105	4.87
[truncated: 65 more columns]
