# Supplementary material for: Full-length transcriptomic identification of R2R3-MYB family genes related to secondary cell wall development in Cunninghamia lanceolata (Chinese fir)
Source: BMC Plant Biol. 2021 Dec 8;21:581. doi: 10.1186/s12870-021-03322-w (PMC8653563; doi:10.1186/s12870-021-03322-w)
Supplement: Supplementary file 9 — Additional file 9: Data S3. Quantification Cq results of 9 ClMYB genes in qRT-PCR. [file 12870_2021_3322_MOESM9_ESM.xlsx]

## Sheet: title
Full-length transcriptomic identification of R2R3-MYB family genes related to secondary cell wall development in Cunninghamia lanceolata (Chinese fir)
Hebi Zhuang1§, Sun-Li Chong1§, Borah Priyanka1, Xiao Han1, Erpei Lin1, Zaikang Tong1, Huahong Huang1*
1State Key Laboratory of Subtropical Silviculture, Zhejiang A&F University, Lin'an, Hangzhou 311300, China
§These authors contributed equally to this work.

## Sheet: ClMYB1
	The quantification Cq results of qRT-PCR for ClMYB1.
	Well	Fluor	Target	Content	Sample	Cq	Cq Mean	Cq Std. Dev
	A1	SYBR	ClActin	Unkn-1	CK10	24.1	24.19	0.078
	B1	SYBR	ClActin	Unkn-1	CK10	24.25	24.19	0.078
	C1	SYBR	ClActin	Unkn-1	CK10	24.21	24.19	0.078
	A2	SYBR	ClActin	Unkn-2	CW10	26.31	26.2	0.129
	B2	SYBR	ClActin	Unkn-2	CW10	26.06	26.2	0.129
	C2	SYBR	ClActin	Unkn-2	CW10	26.24	26.2	0.129
	A3	SYBR	ClActin	Unkn-3	OW10	24.7	24.46	0.211
	B3	SYBR	ClActin	Unkn-3	OW10	24.35	24.46	0.211
	C3	SYBR	ClActin	Unkn-3	OW10	24.32	24.46	0.211
	A4	SYBR	ClActin	Unkn-4	CK30	26.5	26.63	0.112
	B4	SYBR	ClActin	Unkn-4	CK30	26.67	26.63	0.112
	C4	SYBR	ClActin	Unkn-4	CK30	26.71	26.63	0.112
	A5	SYBR	ClActin	Unkn-5	CW30	26.27	26.16	0.118
	B5	SYBR	ClActin	Unkn-5	CW30	26.03	26.16	0.118
	C5	SYBR	ClActin	Unkn-5	CW30	26.18	26.16	0.118
	A6	SYBR	ClActin	Unkn-6	OW30	26.03	26.05	0.225
	B6	SYBR	ClActin	Unkn-6	OW30	26.29	26.05	0.225
	C6	SYBR	ClActin	Unkn-6	OW30	25.84	26.05	0.225
	A7	SYBR	ClActin	Unkn-7	CK60	25.53	25.46	0.207
	B7	SYBR	ClActin	Unkn-7	CK60	25.23	25.46	0.207
	C7	SYBR	ClActin	Unkn-7	CK60	25.62	25.46	0.207
	A8	SYBR	ClActin	Unkn-8	CW60	24.72	24.88	0.144
	B8	SYBR	ClActin	Unkn-8	CW60	25.01	24.88	0.144
	C8	SYBR	ClActin	Unkn-8	CW60	24.9	24.88	0.144
	A9	SYBR	ClActin	Unkn-9	OW60	25.47	25.37	0.122
	B9	SYBR	ClActin	Unkn-9	OW60	25.23	25.37	0.122
	C9	SYBR	ClActin	Unkn-9	OW60	25.39	25.37	0.122
	D1	SYBR	ClMYB1	Unkn-10	CK10	21.43	21.47	0.04
	E1	SYBR	ClMYB1	Unkn-10	CK10	21.46	21.47	0.04
	F1	SYBR	ClMYB1	Unkn-10	CK10	21.51	21.47	0.04
	D2	SYBR	ClMYB1	Unkn-11	CW10	22.96	22.93	0.172
	E2	SYBR	ClMYB1	Unkn-11	CW10	23.09	22.93	0.172
	F2	SYBR	ClMYB1	Unkn-11	CW10	22.75	22.93	0.172
	D3	SYBR	ClMYB1	Unkn-12	OW10	21.62	21.75	0.167
	E3	SYBR	ClMYB1	Unkn-12	OW10	21.7	21.75	0.167
	F3	SYBR	ClMYB1	Unkn-12	OW10	21.94	21.75	0.167
	D4	SYBR	ClMYB1	Unkn-13	CK30	24.57	24.6	0.123
	E4	SYBR	ClMYB1	Unkn-13	CK30	24.74	24.6	0.123
	F4	SYBR	ClMYB1	Unkn-13	CK30	24.5	24.6	0.123
	D5	SYBR	ClMYB1	Unkn-14	CW30	22.54	22.53	0.078
	E5	SYBR	ClMYB1	Unkn-14	CW30	22.61	22.53	0.078
	F5	SYBR	ClMYB1	Unkn-14	CW30	22.45	22.53	0.078
	D6	SYBR	ClMYB1	Unkn-15	OW30	23.52	23.73	0.182
	E6	SYBR	ClMYB1	Unkn-15	OW30	23.85	23.73	0.182
	F6	SYBR	ClMYB1	Unkn-15	OW30	23.82	23.73	0.182
	D7	SYBR	ClMYB1	Unkn-16	CK60	23.15	23.18	0.062
	E7	SYBR	ClMYB1	Unkn-16	CK60	23.25	23.18	0.062
	F7	SYBR	ClMYB1	Unkn-16	CK60	23.13	23.18	0.062
	D8	SYBR	ClMYB1	Unkn-17	CW60	21.27	21.31	0.097
	E8	SYBR	ClMYB1	Unkn-17	CW60	21.42	21.31	0.097
	F8	SYBR	ClMYB1	Unkn-17	CW60	21.23	21.31	0.097
	D9	SYBR	ClMYB1	Unkn-18	OW60	23.13	23.21	0.088
	E9	SYBR	ClMYB1	Unkn-18	OW60	23.31	23.21	0.088
	F9	SYBR	ClMYB1	Unkn-18	OW60	23.19	23.21	0.088

## Sheet: ClMYB2
	The quantification Cq results of qRT-PCR for ClMYB2.
	Well	Fluor	Target	Content	Sample	Cq	Cq Mean	Cq Std. Dev
	A1	SYBR	ClActin	Unkn-1	CK10	25.07	24.99	0.182
	B1	SYBR	ClActin	Unkn-1	CK10	24.79	24.99	0.182
	C1	SYBR	ClActin	Unkn-1	CK10	25.13	24.99	0.182
	A2	SYBR	ClActin	Unkn-2	CW10	26.06	26.2	0.126
	B2	SYBR	ClActin	Unkn-2	CW10	26.24	26.2	0.126
	C2	SYBR	ClActin	Unkn-2	CW10	26.31	26.2	0.126
	A3	SYBR	ClActin	Unkn-3	OW10	25.59	25.64	0.14
	B3	SYBR	ClActin	Unkn-3	OW10	25.54	25.64	0.14
	C3	SYBR	ClActin	Unkn-3	OW10	25.8	25.64	0.14
	A4	SYBR	ClActin	Unkn-4	CK30	26.77	26.64	0.124
	B4	SYBR	ClActin	Unkn-4	CK30	26.53	26.64	0.124
	C4	SYBR	ClActin	Unkn-4	CK30	26.6	26.64	0.124
	A5	SYBR	ClActin	Unkn-5	CW30	26.22	26.16	0.066
	B5	SYBR	ClActin	Unkn-5	CW30	26.09	26.16	0.066
	C5	SYBR	ClActin	Unkn-5	CW30	26.17	26.16	0.066
	A6	SYBR	ClActin	Unkn-6	OW30	26.09	26.06	0.104
	B6	SYBR	ClActin	Unkn-6	OW30	26.14	26.06	0.104
	C6	SYBR	ClActin	Unkn-6	OW30	25.94	26.06	0.104
	A7	SYBR	ClActin	Unkn-7	CK60	25.38	25.47	0.081
	B7	SYBR	ClActin	Unkn-7	CK60	25.51	25.47	0.081
	C7	SYBR	ClActin	Unkn-7	CK60	25.53	25.47	0.081
	A8	SYBR	ClActin	Unkn-8	CW60	25.08	25.26	0.163
	B8	SYBR	ClActin	Unkn-8	CW60	25.29	25.26	0.163
	C8	SYBR	ClActin	Unkn-8	CW60	25.4	25.26	0.163
	A9	SYBR	ClActin	Unkn-9	OW60	25.96	26	0.053
	B9	SYBR	ClActin	Unkn-9	OW60	25.98	26	0.053
	C9	SYBR	ClActin	Unkn-9	OW60	26.06	26	0.053
	D1	SYBR	ClMYB2	Unkn-10	CK10	24.68	24.62	0.077
	E1	SYBR	ClMYB2	Unkn-10	CK10	24.53	24.62	0.077
	F1	SYBR	ClMYB2	Unkn-10	CK10	24.64	24.62	0.077
	D2	SYBR	ClMYB2	Unkn-11	CW10	24.42	24.5	0.182
	E2	SYBR	ClMYB2	Unkn-11	CW10	24.38	24.5	0.182
	F2	SYBR	ClMYB2	Unkn-11	CW10	24.71	24.5	0.182
	D3	SYBR	ClMYB2	Unkn-12	OW10	25.5	25.61	0.141
	E3	SYBR	ClMYB2	Unkn-12	OW10	25.56	25.61	0.141
	F3	SYBR	ClMYB2	Unkn-12	OW10	25.77	25.61	0.141
	D4	SYBR	ClMYB2	Unkn-13	CK30	25.7	25.89	0.167
	E4	SYBR	ClMYB2	Unkn-13	CK30	26.01	25.89	0.167
	F4	SYBR	ClMYB2	Unkn-13	CK30	25.97	25.89	0.167
	D5	SYBR	ClMYB2	Unkn-14	CW30	23.46	23.35	0.103
	E5	SYBR	ClMYB2	Unkn-14	CW30	23.3	23.35	0.103
	F5	SYBR	ClMYB2	Unkn-14	CW30	23.28	23.35	0.103
	D6	SYBR	ClMYB2	Unkn-15	OW30	25.29	25.3	0.125
	E6	SYBR	ClMYB2	Unkn-15	OW30	25.42	25.3	0.125
	F6	SYBR	ClMYB2	Unkn-15	OW30	25.18	25.3	0.125
	D7	SYBR	ClMYB2	Unkn-16	CK60	25.21	25.31	0.1
	E7	SYBR	ClMYB2	Unkn-16	CK60	25.32	25.31	0.1
	F7	SYBR	ClMYB2	Unkn-16	CK60	25.41	25.31	0.1
	D8	SYBR	ClMYB2	Unkn-17	CW60	23.74	23.93	0.162
	E8	SYBR	ClMYB2	Unkn-17	CW60	24.01	23.93	0.162
	F8	SYBR	ClMYB2	Unkn-17	CW60	24.03	23.93	0.162
	D9	SYBR	ClMYB2	Unkn-18	OW60	26.52	26.62	0.095
	E9	SYBR	ClMYB2	Unkn-18	OW60	26.62	26.62	0.095
	F9	SYBR	ClMYB2	Unkn-18	OW60	26.71	26.62	0.095

## Sheet: ClMYB3
	The quantification Cq results of qRT-PCR for ClMYB3.
	Well	Fluor	Target	Content	Sample	Cq	Cq Mean	Cq Std. Dev
	A1	SYBR	ClActin	Unkn-1	CK10	25.18	25.17	0.199
	B1	SYBR	ClActin	Unkn-1	CK10	25.37	25.17	0.199
	C1	SYBR	ClActin	Unkn-1	CK10	24.97	25.17	0.199
	A2	SYBR	ClActin	Unkn-2	CW10	25.93	25.83	0.249
	B2	SYBR	ClActin	Unkn-2	CW10	26.01	25.83	0.249
	C2	SYBR	ClActin	Unkn-2	CW10	25.54	25.83	0.249
	A3	SYBR	ClActin	Unkn-3	OW10	26.34	26.13	0.201
	B3	SYBR	ClActin	Unkn-3	OW10	26.11	26.13	0.201
	C3	SYBR	ClActin	Unkn-3	OW10	25.94	26.13	0.201
	A4	SYBR	ClActin	Unkn-4	CK30	27.24	27.33	0.091
	B4	SYBR	ClActin	Unkn-4	CK30	27.32	27.33	0.091
	C4	SYBR	ClActin	Unkn-4	CK30	27.42	27.33	0.091
	A5	SYBR	ClActin	Unkn-5	CW30	27.12	27.02	0.088
	B5	SYBR	ClActin	Unkn-5	CW30	26.97	27.02	0.088
	C5	SYBR	ClActin	Unkn-5	CW30	26.98	27.02	0.088
	A6	SYBR	ClActin	Unkn-6	OW30	27.04	26.98	0.099
	B6	SYBR	ClActin	Unkn-6	OW30	26.87	26.98	0.099
	C6	SYBR	ClActin	Unkn-6	OW30	27.04	26.98	0.099
	A7	SYBR	ClActin	Unkn-7	CK60	26.22	26.18	0.033
	B7	SYBR	ClActin	Unkn-7	CK60	26.17	26.18	0.033
	C7	SYBR	ClActin	Unkn-7	CK60	26.16	26.18	0.033
	A8	SYBR	ClActin	Unkn-8	CW60	24.16	24.2	0.068
	B8	SYBR	ClActin	Unkn-8	CW60	24.17	24.2	0.068
	C8	SYBR	ClActin	Unkn-8	CW60	24.28	24.2	0.068
	A9	SYBR	ClActin	Unkn-9	OW60	25.55	25.54	0.01
	B9	SYBR	ClActin	Unkn-9	OW60	25.53	25.54	0.01
	C9	SYBR	ClActin	Unkn-9	OW60	25.54	25.54	0.01
	D1	SYBR	ClMYB3	Unkn-10	CK10	26.35	26.24	0.103
	E1	SYBR	ClMYB3	Unkn-10	CK10	26.17	26.24	0.103
	F1	SYBR	ClMYB3	Unkn-10	CK10	26.19	26.24	0.103
	D2	SYBR	ClMYB3	Unkn-11	CW10	27.82	27.76	0.095
	E2	SYBR	ClMYB3	Unkn-11	CW10	27.81	27.76	0.095
	F2	SYBR	ClMYB3	Unkn-11	CW10	27.65	27.76	0.095
	D3	SYBR	ClMYB3	Unkn-12	OW10	26.8	26.98	0.158
	E3	SYBR	ClMYB3	Unkn-12	OW10	27.08	26.98	0.158
	F3	SYBR	ClMYB3	Unkn-12	OW10	27.06	26.98	0.158
	D4	SYBR	ClMYB3	Unkn-13	CK30	26.94	26.74	0.222
	E4	SYBR	ClMYB3	Unkn-13	CK30	26.78	26.74	0.222
	F4	SYBR	ClMYB3	Unkn-13	CK30	26.5	26.74	0.222
	D5	SYBR	ClMYB3	Unkn-14	CW30	28.18	28.09	0.093
	E5	SYBR	ClMYB3	Unkn-14	CW30	28.1	28.09	0.093
	F5	SYBR	ClMYB3	Unkn-14	CW30	28	28.09	0.093
	D6	SYBR	ClMYB3	Unkn-15	OW30	26.32	26.37	0.077
	E6	SYBR	ClMYB3	Unkn-15	OW30	26.46	26.37	0.077
	F6	SYBR	ClMYB3	Unkn-15	OW30	26.33	26.37	0.077
	D7	SYBR	ClMYB3	Unkn-16	CK60	25.13	25.17	0.054
	E7	SYBR	ClMYB3	Unkn-16	CK60	25.13	25.17	0.054
	F7	SYBR	ClMYB3	Unkn-16	CK60	25.23	25.17	0.054
	D8	SYBR	ClMYB3	Unkn-17	CW60	24.73	24.68	0.043
	E8	SYBR	ClMYB3	Unkn-17	CW60	24.68	24.68	0.043
	F8	SYBR	ClMYB3	Unkn-17	CW60	24.64	24.68	0.043
	D9	SYBR	ClMYB3	Unkn-18	OW60	24.23	24.19	0.045
	E9	SYBR	ClMYB3	Unkn-18	OW60	24.14	24.19	0.045
	F9	SYBR	ClMYB3	Unkn-18	OW60	24.19	24.19	0.045

## Sheet: ClMYB4
	The quantification Cq results of qRT-PCR for ClMYB4.
	Well	Fluor	Target	Content	Sample	Cq	Cq Mean	Cq Std. Dev
	A1	SYBR	ClActin	Unkn-1	CK10	25.02	25.23	0.195
	B1	SYBR	ClActin	Unkn-1	CK10	25.4	25.23	0.195
	C1	SYBR	ClActin	Unkn-1	CK10	25.27	25.23	0.195
	A2	SYBR	ClActin	Unkn-2	CW10	26.1	26.06	0.124
	B2	SYBR	ClActin	Unkn-2	CW10	26.15	26.06	0.124
	C2	SYBR	ClActin	Unkn-2	CW10	25.92	26.06	0.124
	A3	SYBR	ClActin	Unkn-3	OW10	25.26	25.34	0.145
	B3	SYBR	ClActin	Unkn-3	OW10	25.26	25.34	0.145
	C3	SYBR	ClActin	Unkn-3	OW10	25.51	25.34	0.145
	A4	SYBR	ClActin	Unkn-4	CK30	27.53	27.56	0.036
	B4	SYBR	ClActin	Unkn-4	CK30	27.58	27.56	0.036
	C4	SYBR	ClActin	Unkn-4	CK30	27.56	27.56	0.036
	A5	SYBR	ClActin	Unkn-5	CW30	27.44	27.63	0.261
	B5	SYBR	ClActin	Unkn-5	CW30	27.81	27.63	0.261
	C5	SYBR	ClActin	Unkn-5	CW30	27.63	27.63	0.261
	A6	SYBR	ClActin	Unkn-6	OW30	27.15	27.25	0.116
	B6	SYBR	ClActin	Unkn-6	OW30	27.23	27.25	0.116
	C6	SYBR	ClActin	Unkn-6	OW30	27.38	27.25	0.116
	A7	SYBR	ClActin	Unkn-7	CK60	26.04	26.03	0.146
	B7	SYBR	ClActin	Unkn-7	CK60	26.17	26.03	0.146
	C7	SYBR	ClActin	Unkn-7	CK60	25.88	26.03	0.146
	A8	SYBR	ClActin	Unkn-8	CW60	25.41	25.34	0.123
	B8	SYBR	ClActin	Unkn-8	CW60	25.41	25.34	0.123
	C8	SYBR	ClActin	Unkn-8	CW60	25.2	25.34	0.123
	A9	SYBR	ClActin	Unkn-9	OW60	26.34	26.16	0.154
	B9	SYBR	ClActin	Unkn-9	OW60	26.04	26.16	0.154
	C9	SYBR	ClActin	Unkn-9	OW60	26.12	26.16	0.154
	D1	SYBR	ClMYB4	Unkn-10	CK10	25.2	25.1	0.118
	E1	SYBR	ClMYB4	Unkn-10	CK10	25.12	25.1	0.118
	F1	SYBR	ClMYB4	Unkn-10	CK10	24.97	25.1	0.118
	D2	SYBR	ClMYB4	Unkn-11	CW10	26.58	26.45	0.118
	E2	SYBR	ClMYB4	Unkn-11	CW10	26.41	26.45	0.118
	F2	SYBR	ClMYB4	Unkn-11	CW10	26.35	26.45	0.118
	D3	SYBR	ClMYB4	Unkn-12	OW10	25.48	25.5	0.112
	E3	SYBR	ClMYB4	Unkn-12	OW10	25.62	25.5	0.112
	F3	SYBR	ClMYB4	Unkn-12	OW10	25.4	25.5	0.112
	D4	SYBR	ClMYB4	Unkn-13	CK30	27.25	27.29	0.06
	E4	SYBR	ClMYB4	Unkn-13	CK30	27.33	27.29	0.06
	F4	SYBR	ClMYB4	Unkn-13	CK30	27.29	27.29	0.06
	D5	SYBR	ClMYB4	Unkn-14	CW30	27.18	27.34	0.149
	E5	SYBR	ClMYB4	Unkn-14	CW30	27.36	27.34	0.149
	F5	SYBR	ClMYB4	Unkn-14	CW30	27.47	27.34	0.149
	D6	SYBR	ClMYB4	Unkn-15	OW30	28.14	28.12	0.148
	E6	SYBR	ClMYB4	Unkn-15	OW30	27.97	28.12	0.148
	F6	SYBR	ClMYB4	Unkn-15	OW30	28.27	28.12	0.148
	D7	SYBR	ClMYB4	Unkn-16	CK60	25.13	25.04	0.087
	E7	SYBR	ClMYB4	Unkn-16	CK60	24.96	25.04	0.087
	F7	SYBR	ClMYB4	Unkn-16	CK60	25.02	25.04	0.087
	D8	SYBR	ClMYB4	Unkn-17	CW60	24.25	24.22	0.149
	E8	SYBR	ClMYB4	Unkn-17	CW60	24.36	24.22	0.149
	F8	SYBR	ClMYB4	Unkn-17	CW60	24.06	24.22	0.149
	D9	SYBR	ClMYB4	Unkn-18	OW60	26.38	26.35	0.07
	E9	SYBR	ClMYB4	Unkn-18	OW60	26.27	26.35	0.07
	F9	SYBR	ClMYB4	Unkn-18	OW60	26.39	26.35	0.07

## Sheet: ClMYB5
	The quantification Cq results of qRT-PCR for ClMYB5.
	Well	Fluor	Target	Content	Sample	Cq	Cq Mean	Cq Std. Dev
	A1	SYBR	ClActin	Unkn-1	CK10	25.4	25.43	0.119
	B1	SYBR	ClActin	Unkn-1	CK10	25.32	25.43	0.119
	C1	SYBR	ClActin	Unkn-1	CK10	25.55	25.43	0.119
	A2	SYBR	ClActin	Unkn-2	CW10	25.28	25.35	0.098
	B2	SYBR	ClActin	Unkn-2	CW10	25.42	25.35	0.098
	C2	SYBR	ClActin	Unkn-2	CW10	25.35	25.35	0.098
	A3	SYBR	ClActin	Unkn-3	OW10	26.03	26.11	0.066
	B3	SYBR	ClActin	Unkn-3	OW10	26.16	26.11	0.066
	C3	SYBR	ClActin	Unkn-3	OW10	26.13	26.11	0.066
	A4	SYBR	ClActin	Unkn-4	CK30	26.76	26.79	0.03
	B4	SYBR	ClActin	Unkn-4	CK30	26.82	26.79	0.03
	C4	SYBR	ClActin	Unkn-4	CK30	26.79	26.79	0.03
	A5	SYBR	ClActin	Unkn-5	CW30	26.22	26.21	0.165227
	B5	SYBR	ClActin	Unkn-5	CW30	26.04	26.21	0.165227
	C5	SYBR	ClActin	Unkn-5	CW30	26.37	26.21	0.165227
	A6	SYBR	ClActin	Unkn-6	OW30	25.75	25.9033	0.155027
	B6	SYBR	ClActin	Unkn-6	OW30	25.9	25.9033	0.155027
	C6	SYBR	ClActin	Unkn-6	OW30	26.06	25.9033	0.155027
	A7	SYBR	ClActin	Unkn-7	CK60	26.16	26.07	0.174
	B7	SYBR	ClActin	Unkn-7	CK60	26.18	26.07	0.174
	C7	SYBR	ClActin	Unkn-7	CK60	25.87	26.07	0.174
	A8	SYBR	ClActin	Unkn-8	CW60	25.21	25.35	0.126
	B8	SYBR	ClActin	Unkn-8	CW60	25.43	25.35	0.126
	C8	SYBR	ClActin	Unkn-8	CW60	25.42	25.35	0.126
	A9	SYBR	ClActin	Unkn-9	OW60	25.82	25.99	0.149
	B9	SYBR	ClActin	Unkn-9	OW60	26.03	25.99	0.149
	C9	SYBR	ClActin	Unkn-9	OW60	26.12	25.99	0.149
	D1	SYBR	ClMYB5	Unkn-10	CK10	25.91	25.78	0.124
	E1	SYBR	ClMYB5	Unkn-10	CK10	25.67	25.78	0.124
	F1	SYBR	ClMYB5	Unkn-10	CK10	25.77	25.78	0.124
	D2	SYBR	ClMYB5	Unkn-11	CW10	25.34	25.32	0.028
	E2	SYBR	ClMYB5	Unkn-11	CW10	25.3	25.32	0.028
	F2	SYBR	ClMYB5	Unkn-11	CW10	25.32	25.32	0.028
	D3	SYBR	ClMYB5	Unkn-12	OW10	25.85	26	0.208
	E3	SYBR	ClMYB5	Unkn-12	OW10	26.14	26	0.208
	F3	SYBR	ClMYB5	Unkn-12	OW10	26	26	0.208
	D4	SYBR	ClMYB5	Unkn-13	CK30	27.65	27.785	0.135
	E4	SYBR	ClMYB5	Unkn-13	CK30	27.785	27.785	0.135
	F4	SYBR	ClMYB5	Unkn-13	CK30	27.92	27.785	0.135
	D5	SYBR	ClMYB5	Unkn-14	CW30	26.15	26.2967	0.127017
	E5	SYBR	ClMYB5	Unkn-14	CW30	26.37	26.2967	0.127017
	F5	SYBR	ClMYB5	Unkn-14	CW30	26.37	26.2967	0.127017
	D6	SYBR	ClMYB5	Unkn-15	OW30	26.45	26.6167	0.22301
	E6	SYBR	ClMYB5	Unkn-15	OW30	26.53	26.6167	0.22301
	F6	SYBR	ClMYB5	Unkn-15	OW30	26.87	26.6167	0.22301
	D7	SYBR	ClMYB5	Unkn-16	CK60	28.07	28.08	0.105
	E7	SYBR	ClMYB5	Unkn-16	CK60	28.19	28.08	0.105
	F7	SYBR	ClMYB5	Unkn-16	CK60	27.98	28.08	0.105
	D8	SYBR	ClMYB5	Unkn-17	CW60	26.32	26.29	0.206
	E8	SYBR	ClMYB5	Unkn-17	CW60	26.48	26.29	0.206
	F8	SYBR	ClMYB5	Unkn-17	CW60	26.07	26.29	0.206
	D9	SYBR	ClMYB5	Unkn-18	OW60	27.94	27.89	0.241
	E9	SYBR	ClMYB5	Unkn-18	OW60	28.1	27.89	0.241
	F9	SYBR	ClMYB5	Unkn-18	OW60	27.63	27.89	0.241

## Sheet: ClMYB26
	The quantification Cq results of qRT-PCR for ClMYB26.
	Well	Fluor	Target	Content	Sample	Cq	Cq Mean	Cq Std. Dev
	A1	SYBR	ClActin	Unkn-1	CK10	25.2	25.36	0.143
	B1	SYBR	ClActin	Unkn-1	CK10	25.39	25.36	0.143
	C1	SYBR	ClActin	Unkn-1	CK10	25.48	25.36	0.143
	A2	SYBR	ClActin	Unkn-2	CW10	25.17	25.24	0.069
	B2	SYBR	ClActin	Unkn-2	CW10	25.31	25.24	0.069
	C2	SYBR	ClActin	Unkn-2	CW10	25.25	25.24	0.069
	A3	SYBR	ClActin	Unkn-3	OW10	26.26	26.35	0.08
	B3	SYBR	ClActin	Unkn-3	OW10	26.4	26.35	0.08
	C3	SYBR	ClActin	Unkn-3	OW10	26.39	26.35	0.08
	A4	SYBR	ClActin	Unkn-4	CK30	27.74	27.81	0.107
	B4	SYBR	ClActin	Unkn-4	CK30	27.76	27.81	0.107
	C4	SYBR	ClActin	Unkn-4	CK30	27.94	27.81	0.107
	A5	SYBR	ClActin	Unkn-5	CW30	26.94	27.15	0.239
	B5	SYBR	ClActin	Unkn-5	CW30	27.09	27.15	0.239
	C5	SYBR	ClActin	Unkn-5	CW30	27.41	27.15	0.239
	A6	SYBR	ClActin	Unkn-6	OW30	27.13	27.04	0.12
	B6	SYBR	ClActin	Unkn-6	OW30	27.07	27.04	0.12
	C6	SYBR	ClActin	Unkn-6	OW30	26.9	27.04	0.12
	A7	SYBR	ClActin	Unkn-7	CK60	25.45	25.3	0.145
	B7	SYBR	ClActin	Unkn-7	CK60	25.16	25.3	0.145
	C7	SYBR	ClActin	Unkn-7	CK60	25.3	25.3	0.145
	A8	SYBR	ClActin	Unkn-8	CW60	25.57	25.55	0.092
	B8	SYBR	ClActin	Unkn-8	CW60	25.63	25.55	0.092
	C8	SYBR	ClActin	Unkn-8	CW60	25.45	25.55	0.092
	A9	SYBR	ClActin	Unkn-9	OW60	26.02	25.93	0.117
	B9	SYBR	ClActin	Unkn-9	OW60	25.98	25.93	0.117
	C9	SYBR	ClActin	Unkn-9	OW60	25.8	25.93	0.117
	D1	SYBR	ClMYB26	Unkn-10	CK10	23.31	23.34	0.038
	E1	SYBR	ClMYB26	Unkn-10	CK10	23.32	23.34	0.038
	F1	SYBR	ClMYB26	Unkn-10	CK10	23.38	23.34	0.038
	D2	SYBR	ClMYB26	Unkn-11	CW10	21.14	21.21	0.06
	E2	SYBR	ClMYB26	Unkn-11	CW10	21.22	21.21	0.06
	F2	SYBR	ClMYB26	Unkn-11	CW10	21.26	21.21	0.06
	D3	SYBR	ClMYB26	Unkn-12	OW10	24.51	24.42	0.084
	E3	SYBR	ClMYB26	Unkn-12	OW10	24.34	24.42	0.084
	F3	SYBR	ClMYB26	Unkn-12	OW10	24.42	24.42	0.084
	D4	SYBR	ClMYB26	Unkn-13	CK30	27.4	27.36	0.034
	E4	SYBR	ClMYB26	Unkn-13	CK30	27.36	27.36	0.034
	F4	SYBR	ClMYB26	Unkn-13	CK30	27.33	27.36	0.034
	D5	SYBR	ClMYB26	Unkn-14	CW30	24.31	24.34	0.085
	E5	SYBR	ClMYB26	Unkn-14	CW30	24.44	24.34	0.085
	F5	SYBR	ClMYB26	Unkn-14	CW30	24.29	24.34	0.085
	D6	SYBR	ClMYB26	Unkn-15	OW30	26.37	26.5	0.122
	E6	SYBR	ClMYB26	Unkn-15	OW30	26.61	26.5	0.122
	F6	SYBR	ClMYB26	Unkn-15	OW30	26.53	26.5	0.122
	D7	SYBR	ClMYB26	Unkn-16	CK60	25.65	25.66	0.011
	E7	SYBR	ClMYB26	Unkn-16	CK60	25.67	25.66	0.011
	F7	SYBR	ClMYB26	Unkn-16	CK60	25.67	25.66	0.011
	D8	SYBR	ClMYB26	Unkn-17	CW60	21.65	21.76	0.091
	E8	SYBR	ClMYB26	Unkn-17	CW60	21.79	21.76	0.091
	F8	SYBR	ClMYB26	Unkn-17	CW60	21.83	21.76	0.091
	D9	SYBR	ClMYB26	Unkn-18	OW60	26.93	26.84	0.237
	E9	SYBR	ClMYB26	Unkn-18	OW60	27.01	26.84	0.237
	F9	SYBR	ClMYB26	Unkn-18	OW60	26.57	26.84	0.237

## Sheet: ClMYB27
	The quantification Cq results of qRT-PCR for ClMYB27.
	Well	Fluor	Target	Content	Sample	Cq	Cq Mean	Cq Std. Dev
	A1	SYBR	ClActin	Unkn-1	CK10	25.44	25.34	0.121
	B1	SYBR	ClActin	Unkn-1	CK10	25.21	25.34	0.121
	C1	SYBR	ClActin	Unkn-1	CK10	25.38	25.34	0.121
	A2	SYBR	ClActin	Unkn-2	CW10	26.23	26.31	0.067
	B2	SYBR	ClActin	Unkn-2	CW10	26.36	26.31	0.067
	C2	SYBR	ClActin	Unkn-2	CW10	26.32	26.31	0.067
	A3	SYBR	ClActin	Unkn-3	OW10	25.55	25.44	0.123
	B3	SYBR	ClActin	Unkn-3	OW10	25.31	25.44	0.123
	C3	SYBR	ClActin	Unkn-3	OW10	25.47	25.44	0.123
	A4	SYBR	ClActin	Unkn-4	CK30	26.96	27	0.119
	B4	SYBR	ClActin	Unkn-4	CK30	26.9	27	0.119
	C4	SYBR	ClActin	Unkn-4	CK30	27.13	27	0.119
	A5	SYBR	ClActin	Unkn-5	CW30	26.28	26.44	0.14
	B5	SYBR	ClActin	Unkn-5	CW30	26.52	26.44	0.14
	C5	SYBR	ClActin	Unkn-5	CW30	26.52	26.44	0.14
	A6	SYBR	ClActin	Unkn-6	OW30	26.23	26.03	0.195
	B6	SYBR	ClActin	Unkn-6	OW30	25.84	26.03	0.195
	C6	SYBR	ClActin	Unkn-6	OW30	26.02	26.03	0.195
	A7	SYBR	ClActin	Unkn-7	CK60	25.42	25.29	0.15
	B7	SYBR	ClActin	Unkn-7	CK60	25.12	25.29	0.15
	C7	SYBR	ClActin	Unkn-7	CK60	25.33	25.29	0.15
	A8	SYBR	ClActin	Unkn-8	CW60	25.44	25.54	0.103
	B8	SYBR	ClActin	Unkn-8	CW60	25.54	25.54	0.103
	C8	SYBR	ClActin	Unkn-8	CW60	25.65	25.54	0.103
	A9	SYBR	ClActin	Unkn-9	OW60	25.97	26	0.059
	B9	SYBR	ClActin	Unkn-9	OW60	25.97	26	0.059
	C9	SYBR	ClActin	Unkn-9	OW60	26.07	26	0.059
	D1	SYBR	ClMYB27	Unkn-10	CK10	22.35	22.41	0.065
	E1	SYBR	ClMYB27	Unkn-10	CK10	22.41	22.41	0.065
	F1	SYBR	ClMYB27	Unkn-10	CK10	22.48	22.41	0.065
	D2	SYBR	ClMYB27	Unkn-11	CW10	21.83	21.77	0.156
	E2	SYBR	ClMYB27	Unkn-11	CW10	21.59	21.77	0.156
	F2	SYBR	ClMYB27	Unkn-11	CW10	21.88	21.77	0.156
	D3	SYBR	ClMYB27	Unkn-12	OW10	23	22.94	0.14
	E3	SYBR	ClMYB27	Unkn-12	OW10	22.78	22.94	0.14
	F3	SYBR	ClMYB27	Unkn-12	OW10	23.03	22.94	0.14
	D4	SYBR	ClMYB27	Unkn-13	CK30	24.67	24.61	0.112
	E4	SYBR	ClMYB27	Unkn-13	CK30	24.48	24.61	0.112
	F4	SYBR	ClMYB27	Unkn-13	CK30	24.68	24.61	0.112
	D5	SYBR	ClMYB27	Unkn-14	CW30	21.9	22.03	0.186
	E5	SYBR	ClMYB27	Unkn-14	CW30	21.95	22.03	0.186
	F5	SYBR	ClMYB27	Unkn-14	CW30	22.24	22.03	0.186
	D6	SYBR	ClMYB27	Unkn-15	OW30	23.83	23.84	0.073
	E6	SYBR	ClMYB27	Unkn-15	OW30	23.77	23.84	0.073
	F6	SYBR	ClMYB27	Unkn-15	OW30	23.92	23.84	0.073
	D7	SYBR	ClMYB27	Unkn-16	CK60	23.25	23.27	0.074
	E7	SYBR	ClMYB27	Unkn-16	CK60	23.21	23.27	0.074
	F7	SYBR	ClMYB27	Unkn-16	CK60	23.35	23.27	0.074
	D8	SYBR	ClMYB27	Unkn-17	CW60	19.82	19.83	0.108
	E8	SYBR	ClMYB27	Unkn-17	CW60	19.73	19.83	0.108
	F8	SYBR	ClMYB27	Unkn-17	CW60	19.95	19.83	0.108
	D9	SYBR	ClMYB27	Unkn-18	OW60	24.37	24.42	0.158
	E9	SYBR	ClMYB27	Unkn-18	OW60	24.29	24.42	0.158
	F9	SYBR	ClMYB27	Unkn-18	OW60	24.6	24.42	0.158

## Sheet: ClMYB49
	The quantification Cq results of qRT-PCR for ClMYB49.
	Well	Fluor	Target	Content	Sample	Cq	Cq Mean	Cq Std. Dev
	A1	SYBR	ClActin	Unkn-1	CK10	25.1	25.01	0.133
	B1	SYBR	ClActin	Unkn-1	CK10	24.86	25.01	0.133
	C1	SYBR	ClActin	Unkn-1	CK10	25.07	25.01	0.133
	A2	SYBR	ClActin	Unkn-2	CW10	25.74	25.82	0.065
	B2	SYBR	ClActin	Unkn-2	CW10	25.87	25.82	0.065
	C2	SYBR	ClActin	Unkn-2	CW10	25.84	25.82	0.065
	A3	SYBR	ClActin	Unkn-3	OW10	25.22	25.23	0.006
	B3	SYBR	ClActin	Unkn-3	OW10	25.23	25.23	0.006
	C3	SYBR	ClActin	Unkn-3	OW10	25.23	25.23	0.006
	A4	SYBR	ClActin	Unkn-4	CK30	27.19	27.1	0.09
	B4	SYBR	ClActin	Unkn-4	CK30	27.01	27.1	0.09
	C4	SYBR	ClActin	Unkn-4	CK30	27.09	27.1	0.09
	A5	SYBR	ClActin	Unkn-5	CW30	25.91	25.93	0.02
	B5	SYBR	ClActin	Unkn-5	CW30	25.93	25.93	0.02
	C5	SYBR	ClActin	Unkn-5	CW30	25.95	25.93	0.02
	A6	SYBR	ClActin	Unkn-6	OW30	25.7	25.81	0.101
	B6	SYBR	ClActin	Unkn-6	OW30	25.82	25.81	0.101
	C6	SYBR	ClActin	Unkn-6	OW30	25.9	25.81	0.101
	A7	SYBR	ClActin	Unkn-7	CK60	25.18	25.25	0.07
	B7	SYBR	ClActin	Unkn-7	CK60	25.25	25.25	0.07
	C7	SYBR	ClActin	Unkn-7	CK60	25.32	25.25	0.07
	A8	SYBR	ClActin	Unkn-8	CW60	24.64	24.83	0.189
	B8	SYBR	ClActin	Unkn-8	CW60	24.84	24.83	0.189
	C8	SYBR	ClActin	Unkn-8	CW60	25.01	24.83	0.189
	A9	SYBR	ClActin	Unkn-9	OW60	25.67	25.69	0.055
	B9	SYBR	ClActin	Unkn-9	OW60	25.64	25.69	0.055
	C9	SYBR	ClActin	Unkn-9	OW60	25.75	25.69	0.055
	D1	SYBR	ClMYB49	Unkn-10	CK10	22.89	22.89	0.149
	E1	SYBR	ClMYB49	Unkn-10	CK10	22.73	22.89	0.149
	F1	SYBR	ClMYB49	Unkn-10	CK10	23.03	22.89	0.149
	D2	SYBR	ClMYB49	Unkn-11	CW10	23.42	23.38	0.087
	E2	SYBR	ClMYB49	Unkn-11	CW10	23.28	23.38	0.087
	F2	SYBR	ClMYB49	Unkn-11	CW10	23.45	23.38	0.087
	D3	SYBR	ClMYB49	Unkn-12	OW10	22.47	22.51	0.153
	E3	SYBR	ClMYB49	Unkn-12	OW10	22.37	22.51	0.153
	F3	SYBR	ClMYB49	Unkn-12	OW10	22.67	22.51	0.153
	D4	SYBR	ClMYB49	Unkn-13	CK30	26.15	26.17	0.036
	E4	SYBR	ClMYB49	Unkn-13	CK30	26.21	26.17	0.036
	F4	SYBR	ClMYB49	Unkn-13	CK30	26.14	26.17	0.036
	D5	SYBR	ClMYB49	Unkn-14	CW30	24.05	24.12	0.065
	E5	SYBR	ClMYB49	Unkn-14	CW30	24.12	24.12	0.065
	F5	SYBR	ClMYB49	Unkn-14	CW30	24.18	24.12	0.065
	D6	SYBR	ClMYB49	Unkn-15	OW30	24.04	24.04	0.18
	E6	SYBR	ClMYB49	Unkn-15	OW30	23.86	24.04	0.18
	F6	SYBR	ClMYB49	Unkn-15	OW30	24.22	24.04	0.18
	D7	SYBR	ClMYB49	Unkn-16	CK60	31.77	31.96	0.195
	E7	SYBR	ClMYB49	Unkn-16	CK60	31.96	31.96	0.195
	F7	SYBR	ClMYB49	Unkn-16	CK60	32.16	31.96	0.195
	D8	SYBR	ClMYB49	Unkn-17	CW60	27.58	27.67	0.095
	E8	SYBR	ClMYB49	Unkn-17	CW60	27.67	27.67	0.095
	F8	SYBR	ClMYB49	Unkn-17	CW60	27.77	27.67	0.095
	D9	SYBR	ClMYB49	Unkn-18	OW60	32.1	32.21	0.105
	E9	SYBR	ClMYB49	Unkn-18	OW60	32.21	32.21	0.105
	F9	SYBR	ClMYB49	Unkn-18	OW60	32.31	32.21	0.105

## Sheet: ClMYB51
	The quantification Cq results of qRT-PCR for ClMYB51.
	Well	Fluor	Target	Content	Sample	Cq	Cq Mean	Cq Std. Dev
	A1	SYBR	ClActin	Unkn-1	CK10	24.98	24.78	0.212
	B1	SYBR	ClActin	Unkn-1	CK10	24.56	24.78	0.212
	C1	SYBR	ClActin	Unkn-1	CK10	24.82	24.78	0.212
	A2	SYBR	ClActin	Unkn-2	CW10	24.62	24.61	0.211
	B2	SYBR	ClActin	Unkn-2	CW10	24.81	24.61	0.211
	C2	SYBR	ClActin	Unkn-2	CW10	24.39	24.61	0.211
	A3	SYBR	ClActin	Unkn-3	OW10	26.05	26.1	0.074
	B3	SYBR	ClActin	Unkn-3	OW10	26.19	26.1	0.074
	C3	SYBR	ClActin	Unkn-3	OW10	26.07	26.1	0.074
	A4	SYBR	ClActin	Unkn-4	CK30	28.67	28.7	0.035
	B4	SYBR	ClActin	Unkn-4	CK30	28.7	28.7	0.035
	C4	SYBR	ClActin	Unkn-4	CK30	28.74	28.7	0.035
	A5	SYBR	ClActin	Unkn-5	CW30	26.33	26.43	0.114
	B5	SYBR	ClActin	Unkn-5	CW30	26.41	26.43	0.114
	C5	SYBR	ClActin	Unkn-5	CW30	26.55	26.43	0.114
	A6	SYBR	ClActin	Unkn-6	OW30	27.1	26.97	0.112
	B6	SYBR	ClActin	Unkn-6	OW30	26.88	26.97	0.112
	C6	SYBR	ClActin	Unkn-6	OW30	26.94	26.97	0.112
	A7	SYBR	ClActin	Unkn-7	CK60	26	26.08	0.103
	B7	SYBR	ClActin	Unkn-7	CK60	26.04	26.08	0.103
	C7	SYBR	ClActin	Unkn-7	CK60	26.19	26.08	0.103
	A8	SYBR	ClActin	Unkn-8	CW60	25.22	25.32	0.095
	B8	SYBR	ClActin	Unkn-8	CW60	25.33	25.32	0.095
	C8	SYBR	ClActin	Unkn-8	CW60	25.41	25.32	0.095
	A9	SYBR	ClActin	Unkn-9	OW60	24.34	24.27	0.107
	B9	SYBR	ClActin	Unkn-9	OW60	24.15	24.27	0.107
	C9	SYBR	ClActin	Unkn-9	OW60	24.32	24.27	0.107
	D1	SYBR	ClMYB51	Unkn-10	CK10	22.86	23.02	0.141
	E1	SYBR	ClMYB51	Unkn-10	CK10	23.07	23.02	0.141
	F1	SYBR	ClMYB51	Unkn-10	CK10	23.12	23.02	0.141
	D2	SYBR	ClMYB51	Unkn-11	CW10	22.43	22.68	0.213
	E2	SYBR	ClMYB51	Unkn-11	CW10	22.75	22.68	0.213
	F2	SYBR	ClMYB51	Unkn-11	CW10	22.84	22.68	0.213
	D3	SYBR	ClMYB51	Unkn-12	OW10	23.81	23.68	0.136
	E3	SYBR	ClMYB51	Unkn-12	OW10	23.54	23.68	0.136
	F3	SYBR	ClMYB51	Unkn-12	OW10	23.7	23.68	0.136
	D4	SYBR	ClMYB51	Unkn-13	CK30	27.17	27.25	0.085
	E4	SYBR	ClMYB51	Unkn-13	CK30	27.25	27.25	0.085
	F4	SYBR	ClMYB51	Unkn-13	CK30	27.34	27.25	0.085
	D5	SYBR	ClMYB51	Unkn-14	CW30	25.25	25.24	0.111
	E5	SYBR	ClMYB51	Unkn-14	CW30	25.12	25.24	0.111
	F5	SYBR	ClMYB51	Unkn-14	CW30	25.34	25.24	0.111
	D6	SYBR	ClMYB51	Unkn-15	OW30	25.7	25.71	0.143
	E6	SYBR	ClMYB51	Unkn-15	OW30	25.57	25.71	0.143
	F6	SYBR	ClMYB51	Unkn-15	OW30	25.85	25.71	0.143
	D7	SYBR	ClMYB51	Unkn-16	CK60	24.23	24.18	0.133
	E7	SYBR	ClMYB51	Unkn-16	CK60	24.03	24.18	0.133
	F7	SYBR	ClMYB51	Unkn-16	CK60	24.28	24.18	0.133
	D8	SYBR	ClMYB51	Unkn-17	CW60	23.42	23.46	0.08
	E8	SYBR	ClMYB51	Unkn-17	CW60	23.41	23.46	0.08
	F8	SYBR	ClMYB51	Unkn-17	CW60	23.55	23.46	0.08
	D9	SYBR	ClMYB51	Unkn-18	OW60	22.78	22.72	0.083
	E9	SYBR	ClMYB51	Unkn-18	OW60	22.62	22.72	0.083
	F9	SYBR	ClMYB51	Unkn-18	OW60	22.75	22.72	0.083
