# Supplementary material for: Full-length transcriptomic identification of R2R3-MYB family genes related to secondary cell wall development in Cunninghamia lanceolata (Chinese fir)
Source: BMC Plant Biol. 2021 Dec 8;21:581. doi: 10.1186/s12870-021-03322-w (PMC8653563; doi:10.1186/s12870-021-03322-w)
Supplement: Supplementary file 10 — Additional file 10: Data S4. Lignin contents of stems from transgenic lines and wide-type. [file 12870_2021_3322_MOESM10_ESM.xlsx]

## Sheet: Sheet1
Full-length transcriptomic identification of R2R3-MYB family genes related to secondary cell wall development in Cunninghamia lanceolata (Chinese fir)
Hebi Zhuang1§, Sun-Li Chong1§, Borah Priyanka1, Xiao Han1, Erpei Lin1, Zaikang Tong1, Huahong Huang1*
1State Key Laboratory of Subtropical Silviculture, Zhejiang A&F University, Lin'an, Hangzhou 311300, China
§These authors contributed equally to this work.
Lignin contents of stem from transgenic lines and wide-type.
Samples	Lignin content (A280/g DW)
	repeat 1	repeat 2	repeat 3
WT	2.35	2.5	2.6
T3.1	3.2	3.45	3.6
T3.2	6.25	6.85	5.9
